# Supplementary material for: Assessment of Bidirectional Relationships between Leisure Sedentary Behaviors and Neuropsychiatric Disorders: A Two-Sample Mendelian Randomization Study
Source: Genes (Basel). 2022 May 27;13(6):962. doi: 10.3390/genes13060962 (PMC9223103; doi:10.3390/genes13060962)
Supplement: Supplementary file 1 [file genes-13-00962-s001.zip]

Archive with 4 entries (4 files):
- Supplementary Figures S1-S12.pdf
- Supplementary_Data_S1.xlsx
- Supplementary_Data_S2.xlsx
- Supplementary_Tables S1-S15.xlsx
