# Supplementary material for: Assessment of Bidirectional Relationships between Leisure Sedentary Behaviors and Neuropsychiatric Disorders: A Two-Sample Mendelian Randomization Study
Source: Genes (Basel). 2022 May 27;13(6):962. doi: 10.3390/genes13060962 (PMC9223103; doi:10.3390/genes13060962)
Supplement: Supplementary file 1 [file genes-13-00962-s001.zip › Supplementary_Data_S1.xlsx]

## Sheet: tel_AD
etable1. Top SNPs for Television watching (P <1e08) on AD
Notes: Estimated variance explained by genetic instruments was the sum of estimated variance explained by each variant calculated from original study.
SNP	Proxy SNP	r2 for proxy	effect allele	beta (exposure)	se (exposure)	samplesize (exposure)	beta (outcome)	se (outcome)	mr_keep	estimated variance (%)	F
rs10041724			T	0.0180931	0.00273852	422218	-0.0044	0.0193	TRUE	0.00011819	49.3563
rs10054327	rs34070447	1	G	0.0172449	0.00219021	422218	0.0131	0.0161	TRUE	0.000156878	65.5149
rs10189857			A	-0.020463	0.00217999	422218	-0.0428	0.0163	TRUE	0.000228184	95.3006
rs1031423			T	-0.0185194	0.00262613	422218	-0.0146	0.0196	TRUE	0.00012183	50.8764
rs10771746	rs11051008	1	C	-0.0142821	0.00239463	422218	0.0028	0.0175	TRUE	9.60745e-05	40.12
rs10772643	rs10772644	1	C	0.0247995	0.00349653	422218	-0.0032	0.0257	TRUE	0.000116853	48.7981
rs10876864			G	-0.0133403	0.0021844	422218	-0.0022	0.0156	TRUE	9.57366e-05	39.9788
rs10932837			C	-0.0131055	0.00216152	422218	-0.0058	0.016	TRUE	9.40952e-05	39.2933
rs10947452	rs12055409	0.91	T	0.0140576	0.00227421	422218	-0.0159	0.0166	TRUE	9.46285e-05	39.516
rs11130793	rs11708288	0.99	C	0.0129223	0.00221055	422218	-0.0005	0.0164	TRUE	9.51157e-05	39.7195
rs11218575			C	0.0153751	0.00218733	422218	-0.0285	0.0159	TRUE	0.000110375	46.0925
rs11245482			T	-0.0132329	0.00222132	422218	0.006	0.0165	TRUE	8.79458e-05	36.7252
rs114720649			C	-0.0135456	0.00221865	422218	-0.0232	0.0167	TRUE
rs11714337	rs7610856	0.98	G	0.0144017	0.00218888	422218	-0.0033	0.0158	TRUE	0.000127044	53.054
rs12105701			C	-0.0128825	0.00220843	422218	0.0105	0.0159	TRUE	7.30392e-05	30.4999
rs12342024	rs73571431	0.94	G	-0.0205172	0.00340797	422218	-0.0357	0.0247	TRUE	8.59574e-05	35.8948
rs1243182			C	-0.0185916	0.00234162	422218	0.0284	0.0171	TRUE	0.00016123	67.3328
rs12491503			G	-0.0142607	0.00229906	422218	0.0141	0.0164	TRUE	9.14285e-05	38.1797
rs12554512	rs4977836	0.97	T	0.0207024	0.00219328	422218	0.022	0.0172	TRUE	0.0002412	100.738
rs13107325			C	-0.0291705	0.00412256	422218	-0.0509	0.0308	TRUE	0.000135778	56.7019
rs1451533			G	-0.0157043	0.00243314	422218	-0.0287	0.018	TRUE	0.000103795	43.3443
rs148648822			G	-0.017551	0.00298724	422218	-0.017	0.0261	TRUE	8.28667e-05	34.604
rs17207890			G	0.015694	0.00228666	422218	0.0271	0.0162	TRUE	0.00012556	52.4345
rs17727474			C	0.017551	0.00296085	422218	0.026	0.0214	TRUE	8.69116e-05	36.2933
rs17789218			T	0.0185965	0.00251401	422218	0.0027	0.0196	TRUE	0.000136465	56.9889
rs1913808			G	0.0149234	0.0023854	422218	-0.0002	0.0168	TRUE	8.724e-05	36.4304
rs2034768	rs13082629	0.98	A	0.0147356	0.00215816	422218	-0.0055	0.0156	TRUE	0.00011983	50.0412
rs2045147			A	0.0126686	0.00217659	422218	0.0108	0.0155	TRUE	6.84294e-05	28.5748
rs2073869			C	0.0186112	0.0029076	422218	0	0.0213	TRUE	0.000104681	43.7145
rs2173650	rs79644799	1	G	0.017845	0.00304387	422218	0	0.0223	TRUE	8.9116e-05	37.2139
rs2184364			A	0.0156396	0.00263677	422218	0.0015	0.021	TRUE	8.96544e-05	37.4387
rs2291681			G	0.0127084	0.00220239	422218	0.0035	0.016	TRUE	7.73357e-05	32.2942
rs2447098			C	-0.014947	0.00217845	422218	0.0138	0.0162	TRUE	0.000118899	49.6525
rs2460			G	-0.0152938	0.00245865	422218	-0.0026	0.018	TRUE	0.000101546	42.4052
rs2584597			T	0.0150996	0.00239572	422218	-0.02	0.0226	TRUE	9.49274e-05	39.6409
rs2616830			G	0.0164651	0.00216551	422218	0.0159	0.0155	TRUE	0.000127012	53.041
rs262890	rs35141390	1	A	-0.0185683	0.00235563	422218	0.0024	0.0176	TRUE	0.000154282	64.4306
rs263771			C	-0.017013	0.00256135	422218	0.0023	0.0196	TRUE	0.0001239	51.7409
rs2971640			G	-0.0126576	0.00215401	422218	-0.0307	0.0154	TRUE	9.05157e-05	37.7984
rs303753			G	-0.0144597	0.00229051	422218	-0.0121	0.0167	TRUE	0.000108448	45.2874
rs34864022			A	-0.0263815	0.00435706	422218	-0.077	0.0336	TRUE	9.14389e-05	38.184
rs374722			G	0.0244932	0.0030238	422218	0.0091	0.0217	TRUE	0.000178961	74.7389
rs3754970	rs7309	0.97	T	-0.014997	0.0021699	422218	0.0151	0.0156	TRUE	0.000146342	61.1145
rs3796386			G	-0.0261712	0.0021795	422218	0.0123	0.0157	TRUE	0.000393335	164.302
rs4382592			T	0.0136721	0.00235776	422218	-0.0039	0.0165	TRUE	9.15286e-05	38.2215
rs4577309			A	0.0160037	0.00216796	422218	0.0247	0.0156	TRUE	0.000123905	51.7433
rs4845364			A	-0.0153008	0.00215604	422218	-0.0134	0.0154	TRUE	0.000129079	53.9041
rs56103247	rs73149487	0.97	C	0.0297647	0.00475247	422218	-0.0575	0.0605	TRUE	9.35251e-05	39.0552
rs56398417	rs56112330	0.99	C	0.0144253	0.00232895	422218	-0.0096	0.0174	TRUE	0.0001043	43.5553
rs56858768			G	-0.0148792	0.00236956	422218	-0.011	0.0172	TRUE	0.000103885	43.3818
rs57585211			T	-0.0167329	0.00285006	422218	-0.0197	0.0209	TRUE	8.21476e-05	34.3037
rs6131281			C	0.0160808	0.00220553	422218	-0.0071	0.0159	TRUE	0.000132752	55.4381
rs6141814	rs2377668		C	-0.0135023	0.00222588	422218	0.0022	0.0163	TRUE	9.33509e-05	38.9825
rs62379379	rs17097461	0.96	G	-0.0260246	0.0042322	422218	-0.0334	0.0335	TRUE	8.77013e-05	36.6231
rs62641636			A	0.0144237	0.00233911	422218	0.0283	0.0171	TRUE	0.000101957	42.5768
rs6472942			T	-0.0131633	0.00218761	422218	-0.0157	0.0162	TRUE	8.53488e-05	35.6406
rs648044			A	-0.013834	0.00226591	422218	0.0008	0.0188	TRUE	0.000107849	45.0376
rs6673341			T	-0.014513	0.0021693	422218	-0.013	0.0162	TRUE	0.000113288	47.3088
rs6797840			A	-0.0161032	0.00218412	422218	0.0257	0.0156	TRUE	0.00013498	56.3689
rs6825241			C	-0.0169583	0.00216609	422218	0.0295	0.0155	TRUE	0.000151773	63.3827
rs6850494	rs11725694	1	A	-0.0143297	0.00222236	422218	-0.0102	0.0162	TRUE	0.000107751	44.9966
rs6905544			A	-0.0189935	0.00221031	422218	-0.0237	0.0157	TRUE	0.000222222	92.8099
rs7184800	rs72801843	0.97	G	0.0168167	0.00234935	422218	-0.0029	0.0169	TRUE	0.000138284	57.7487
rs7189927			T	0.0149741	0.00225865	422218	-0.0139	0.0179	TRUE	0.000116723	48.7435
rs7248205			C	0.0139253	0.00221689	422218	-0.0184	0.0174	TRUE	0.000108777	45.425
rs72781699			G	-0.0186804	0.00267802	422218	0.0023	0.0191	TRUE	0.000142439	59.4842
rs72828890	rs72828886	1	C	0.0192918	0.00329837	422218	-0.0029	0.0296	TRUE	9.50643e-05	39.698
rs72834698			G	0.0226559	0.0031007	422218	0.0079	0.024	TRUE	0.000162411	67.826
rs74802478	rs11222914	1	G	0.0166419	0.00281818	422218	0.0262	0.0216	TRUE	7.71565e-05	32.2193
rs749671			G	0.015654	0.00223821	422218	-0.0331	0.0161	TRUE	0.000125633	52.4649
rs7564130			T	-0.0149864	0.00225071	422218	-0.0349	0.0166	TRUE	0.000111634	46.6183
rs7693703			G	0.0228437	0.0038412	422218	0.0024	0.0265	TRUE	8.322e-05	34.7516
rs7716447	rs4382197	0.98	A	-0.0133844	0.00226863	422218	0.0215	0.0168	TRUE	9.28548e-05	38.7753
rs7788008			G	0.0126792	0.0021785	422218	-0.0183	0.0155	TRUE	8.43041e-05	35.2043
rs78394231			T	-0.0208531	0.00363518	422218	-0.0164	0.0278	TRUE	0.000102601	42.8456
rs801733			A	0.0168585	0.00225323	422218	-0.0219	0.016	TRUE	0.000144088	60.1728
rs8756			C	-0.0134501	0.00216618	422218	-0.0225	0.0156	TRUE	9.62184e-05	40.1801
rs9471333	rs10573491	0.99	C	0.0131038	0.00216935	422218	0.0222	0.0155	TRUE	0.000104861	43.7896
rs9563168			G	0.0175868	0.00266741	422218	-0.0038	0.0188	TRUE	0.000110774	46.2589
rs9569734	rs9569733	0.99	A	0.0188846	0.00300692	422218	-0.0222	0.0225	TRUE	0.000111192	46.4335
rs9834970			T	0.0127684	0.00215775	422218	0.0067	0.0156	TRUE	8.92115e-05	37.2538
rs984409	rs2121051	0.99	G	-0.0148683	0.00225294	422218	0.0173	0.0162	TRUE	0.000105797	44.1803
rs9867121			C	0.0194994	0.00280905	422218	-0.04	0.0204	TRUE	0.000114637	47.8725
rs9902312			T	0.0153237	0.00232706	422218	-0.0094	0.0169	TRUE	9.79427e-05	40.9002
rs9964724			C	0.0176465	0.00232664	422218	0.0023	0.0171	TRUE	0.000170406	71.1653
										0.00988665

## Sheet: com_AD
etable2. Top SNPs for Computer use (P <1e08) on AD
Notes: Estimated variance explained by genetic instruments was the sum of estimated variance explained by each variant calculated from original study.
SNP	Proxy SNP	r2 for proxy	effect allele	beta (exposure)	se (exposure)	samplesize (exposure)	beta (outcome)	se (outcome)	mr_keep	estimated variance (%)	F
rs10208088	rs12471188	1	C	0.0131026	0.00223225	422218	-0.0172	0.0157	TRUE	9.20716e-05	38.2062
rs113851275	rs16909964	1	G	-0.0209442	0.00353742	422218	-0.0859	0.0296	TRUE	8.60182e-05	35.6941
rs11708955	rs9821311	0.99	T	-0.0157497	0.00238749	422218	0.0044	0.0177	TRUE	0.000113732	47.1956
rs11749912	rs10661710	1	A	0.0139203	0.00223731	422218	-0.0354	0.016	TRUE	9.48179e-05	39.346
rs13262595			A	-0.0157346	0.00221517	422218	0.0205	0.0158	TRUE	0.000123245	51.1435
rs1448355			C	-0.0146118	0.00227388	422218	0.0203	0.0173	TRUE	9.82547e-05	40.7723
rs166835			C	0.0131356	0.00222179	422218	-0.0186	0.016	TRUE	8.9592e-05	37.1772
rs17789218			T	-0.0150545	0.00256134	422218	0.0027	0.0196	TRUE	8.5679e-05	35.5533
rs2068625			T	-0.0158375	0.00239755	422218	0.0256	0.0174	TRUE	0.000107989	44.8119
rs206965			T	0.0156007	0.00271472	422218	-0.0046	0.0193	TRUE	8.18572e-05	33.9673
rs2345941			A	0.014647	0.00221726	422218	-0.0009	0.016	TRUE	0.000116445	48.3216
rs2734849			A	-0.0135145	0.00220049	422218	-0.0066	0.0154	TRUE	9.70022e-05	40.2524
rs2748985	rs2803348	0.99	T	-0.0153444	0.00221274	422218	-0.008	0.0167	TRUE	0.00012213	50.6808
rs35933007			G	-0.0151917	0.00264445	422218	-0.0345	0.0237	TRUE	8.79236e-05	36.4848
rs4073003			A	0.0201634	0.00331978	422218	0.0216	0.0257	TRUE	9.54383e-05	39.6034
rs4977839	rs7467480	1	G	-0.0199181	0.00223302	422218	0.0231	0.017	TRUE	0.000201119	83.4659
rs55772938	rs4717533	0.9	A	-0.0151223	0.00241703	422218	0.028	0.017	TRUE	0.000102105	42.3703
rs6744254			C	-0.0159012	0.00220373	422218	0.0266	0.016	TRUE	0.000126521	52.5033
rs6774533			C	-0.0149436	0.00245831	422218	0.0086	0.0173	TRUE	9.1403e-05	37.9288
rs73578186			C	0.0149904	0.00236483	422218	-0.0085	0.0164	TRUE	9.66326e-05	40.099
rs9372625			G	-0.0183911	0.00227197	422218	0.0257	0.0162	TRUE	0.000164531	68.2793
rs984409			G	0.00201625	0.00229668	422218	0.0173	0.0162	TRUE	0.000105797	44.1803
										0.0023803

## Sheet: drv_AD
etable3. Top SNPs for Driving (P <1e08) on AD
Notes: Estimated variance explained by genetic instruments was the sum of estimated variance explained by each variant calculated from original study.
SNP	Proxy SNP	r2 for proxy	effect allele	beta (exposure)	se (exposure)	samplesize (exposure)	beta (outcome)	se (outcome)	mr_keep	estimated variance (%)	F
rs10186876	rs12464441	0.92	A	0.0144048	0.00233801	422218	-0.0302	0.0161	TRUE	9.81272e-05	40.6819
rs1198575			T	0.0189685	0.00282745	422218	0.0186	0.0203	TRUE	0.000111405	46.1872
rs4765541	rs7311969	1	T	0.0137597	0.00235511	422218	-0.01	0.0162	TRUE	8.47533e-05	35.1369
rs6012558			G	0.0144779	0.00226377	422218	-0.0011	0.0158	TRUE	0.000101472	42.0689
										0.000395758

## Sheet: tel_SCZ
etable4 . Top SNPs for Television watching (P <1e08) on SCZ
Notes: Estimated variance explained by genetic instruments was the sum of estimated variance explained by each variant calculated from original study.
SNP	Proxy SNP	r2 for proxy	effect allele	beta (exposure)	se (exposure)	samplesize (exposure)	beta (outcome)	se (outcome)	mr_keep	estimated variance (%)	F
rs10041724			T	0.0180931	0.00273852	422218	-0.0114655	0.0118606	TRUE	0.00011819	49.3563
rs10054327			G	0.0172449	0.00219021	422218	0.00588266	0.0096494	TRUE	0.000156878	65.5149
rs10189857			A	-0.020463	0.00217999	422218	0.0486949	0.00965571	TRUE	0.000228184	95.3006
rs1031423			T	-0.0185194	0.00262613	422218	-0.0115565	0.0118808	TRUE	0.00012183	50.8764
rs10771746			C	-0.0142821	0.00239463	422218	0.0103463	0.0103803	TRUE	9.60745e-05	40.12
rs10772643			C	0.0247995	0.00349653	422218	-0.00231267	0.0151283	TRUE	0.000116853	48.7981
rs10876864			G	-0.0133403	0.0021844	422218	-0.00765926	0.00972205	TRUE	9.57366e-05	39.9788
rs10932837			C	-0.0131055	0.00216152	422218	-0.0207947	0.00970282	TRUE	9.40952e-05	39.2933
rs10947452			T	0.0140576	0.00227421	422218	-0.0346329	0.0100626	TRUE	9.46285e-05	39.516
rs11130793			C	0.0129223	0.00221055	422218	-0.00677288	0.00978656	TRUE	9.51157e-05	39.7195
rs11218575			C	0.0153751	0.00218733	422218	0.0253753	0.00971469	TRUE	0.000110375	46.0925
rs11245482			T	-0.0132329	0.00222132	422218	0.00796817	0.00975864	TRUE	8.79458e-05	36.7252
rs11689199			A	0.0184644	0.00220443	422218	0.00806737	0.00983581	TRUE	0.000181048	75.6107
rs11714337			G	0.0144017	0.00218888	422218	0.0545829	0.00987783	TRUE	0.000127044	53.054
rs11917871			T	-0.0166474	0.00220627	422218	-0.00263347	0.00987425	TRUE	0.0001205	50.321
rs12105701			C	-0.0128825	0.00220843	422218	0.0167588	0.00990024	TRUE	7.30392e-05	30.4999
rs12342024			G	-0.0205172	0.00340797	422218	-0.000170014	0.0150721	TRUE	8.59574e-05	35.8948
rs1243182			C	-0.0185916	0.00234162	422218	0.00259663	0.0101868	TRUE	0.00016123	67.3328
rs12491503			G	-0.0142607	0.00229906	422218	-0.00296439	0.0100893	TRUE	9.14285e-05	38.1797
rs12554512			T	0.0207024	0.00219328	422218	0.0188218	0.00982487	TRUE	0.0002412	100.738
rs13107325			C	-0.0291705	0.00412256	422218	-0.159606	0.0192665	TRUE	0.000135778	56.7019
rs1451533			G	-0.0157043	0.00243314	422218	-0.00302457	0.0106347	TRUE	0.000103795	43.3443
rs148544378			C	0.0531894	0.00757316	422218	0.022544	0.0416701	TRUE	0.000130347	54.4337
rs148648822			G	-0.017551	0.00298724	422218	0.00608147	0.0139688	TRUE	8.28667e-05	34.604
rs17207890			G	0.015694	0.00228666	422218	-0.0140989	0.0100247	TRUE	0.00012556	52.4345
rs17727474			C	0.017551	0.00296085	422218	0.018331	0.0129588	TRUE	8.69116e-05	36.2933
rs17789218			T	0.0185965	0.00251401	422218	0.0217615	0.0120999	TRUE	0.000136465	56.9889
rs1913808			G	0.0149234	0.0023854	422218	0.0273233	0.0106777	TRUE	8.724e-05	36.4304
rs2034768			A	0.0147356	0.00215816	422218	-0.0237805	0.00951011	TRUE	0.00011983	50.0412
rs2045147			A	0.0126686	0.00217659	422218	0.031983	0.00955291	TRUE	6.84294e-05	28.5748
rs2073869			C	0.0186112	0.0029076	422218	0.0124225	0.0124711	TRUE	0.000104681	43.7145
rs2173650			G	0.017845	0.00304387	422218	-0.0153979	0.0136874	TRUE	8.9116e-05	37.2139
rs2184364			A	0.0156396	0.00263677	422218	0.0161686	0.0118934	TRUE	8.96544e-05	37.4387
rs2291681			G	0.0127084	0.00220239	422218	0.0240095	0.00964512	TRUE	7.73357e-05	32.2942
rs2447098			C	-0.014947	0.00217845	422218	-0.0147381	0.00967551	TRUE	0.000118899	49.6525
rs2460			G	-0.0152938	0.00245865	422218	0.0112366	0.0109272	TRUE	0.000101546	42.4052
rs2584597			T	0.0150996	0.00239572	422218	-0.0166885	0.0108205	TRUE	9.49274e-05	39.6409
rs2616830			G	0.0164651	0.00216551	422218	-0.00237281	0.00954618	TRUE	0.000127012	53.041
rs262890			A	-0.0185683	0.00235563	422218	0.00518653	0.0104658	TRUE	0.000154282	64.4306
rs263771			C	-0.017013	0.00256135	422218	-0.033805	0.0113908	TRUE	0.0001239	51.7409
rs2971640			G	-0.0126576	0.00215401	422218	-0.0208866	0.00948741	TRUE	9.05157e-05	37.7984
rs303753			G	-0.0144597	0.00229051	422218	-0.0175023	0.0102977	TRUE	0.000108448	45.2874
rs3135044			C	-0.0145909	0.0022488	422218	-0.0775832	0.010372	TRUE	0.000102372	42.7501
rs34811474			G	0.0152829	0.00255709	422218	-0.0013409	0.013301	TRUE	9.89474e-05	41.3198
rs34864022			A	-0.0263815	0.00435706	422218	0.0199987	0.0205897	TRUE	9.14389e-05	38.184
rs374722			G	0.0244932	0.0030238	422218	-0.0184797	0.013149	TRUE	0.000178961	74.7389
rs3754970			T	-0.014997	0.0021699	422218	-0.0252358	0.00977067	TRUE	0.000146342	61.1145
rs3796386			G	-0.0261712	0.0021795	422218	0.0123237	0.00980294	TRUE	0.000393335	164.302
rs4382592			T	0.0136721	0.00235776	422218	0.00109939	0.0102519	TRUE	9.15286e-05	38.2215
rs4577309			A	0.0160037	0.00216796	422218	-0.0240878	0.00954318	TRUE	0.000123905	51.7433
rs4845364			A	-0.0153008	0.00215604	422218	-0.029264	0.00959954	TRUE	0.000129079	53.9041
rs4973576			C	-0.0145232	0.00237947	422218	0.0792732	0.0106406	TRUE	8.93216e-05	37.2997
rs56103247			C	0.0297647	0.00475247	422218	-0.011334	0.0239114	TRUE	9.35251e-05	39.0552
rs56398417			C	0.0144253	0.00232895	422218	-0.00103053	0.0104709	TRUE	0.0001043	43.5553
rs56858768			G	-0.0148792	0.00236956	422218	-0.00871789	0.01057	TRUE	0.000103885	43.3818
rs57585211			T	-0.0167329	0.00285006	422218	-0.0544034	0.0125421	TRUE	8.21476e-05	34.3037
rs6131281			C	0.0160808	0.00220553	422218	0.0144944	0.00973963	TRUE	0.000132752	55.4381
rs6141814			C	-0.0135023	0.00222588	422218	-0.0190809	0.00991094	TRUE	9.33509e-05	38.9825
rs62332760			G	-0.0144128	0.00221698	422218	0.0257652	0.00992056	TRUE	0.00010249	42.7992
rs62379379			G	-0.0260246	0.0042322	422218	-0.00271368	0.0178849	TRUE	8.77013e-05	36.6231
rs62641636			A	0.0144237	0.00233911	422218	-0.0216221	0.0103938	TRUE	0.000101957	42.5768
rs6472942			T	-0.0131633	0.00218761	422218	0.00149888	0.00997863	TRUE	8.53488e-05	35.6406
rs648044			A	-0.013834	0.00226591	422218	0.00458945	0.0105051	TRUE	0.000107849	45.0376
rs6673341			T	-0.014513	0.0021693	422218	0.0168571	0.00963205	TRUE	0.000113288	47.3088
rs66852340			C	-0.0177896	0.00260074	422218	-0.00180162	0.0114619	TRUE	0.000124026	51.7936
rs67532025			G	-0.0137459	0.00220944	422218	0.0291995	0.00978956	TRUE
rs6797840			A	-0.0161032	0.00218412	422218	0.0119286	0.00954496	TRUE	0.00013498	56.3689
rs6825241			C	-0.0169583	0.00216609	422218	-0.00598789	0.00950241	TRUE	0.000151773	63.3827
rs6850494			A	-0.0143297	0.00222236	422218	-0.000670225	0.00973296	TRUE	0.000107751	44.9966
rs6905544			A	-0.0189935	0.00221031	422218	0.0323704	0.0096686	TRUE	0.000222222	92.8099
rs70940164			C	0.0137423	0.00237469	422218	0.0103999	0.0107249	TRUE
rs71589039			G	0.0127191	0.00220369	422218	-0.00830035	0.00977908	TRUE
rs7184800			G	0.0168167	0.00234935	422218	0.0044899	0.0105906	TRUE	0.000138284	57.7487
rs7189927			T	0.0149741	0.00225865	422218	0.0256677	0.0102055	TRUE	0.000116723	48.7435
rs7248205			C	0.0139253	0.00221689	422218	0.00568382	0.00991826	TRUE	0.000108777	45.425
rs72725224			A	-0.0464317	0.007876	422218	0.0795503	0.0386952	TRUE	7.37204e-05	30.7844
rs72781699			G	-0.0186804	0.00267802	422218	-0.020468	0.0119974	TRUE	0.000142439	59.4842
rs72828890			C	0.0192918	0.00329837	422218	0.0248877	0.0158253	TRUE	9.50643e-05	39.698
rs72834698			G	0.0226559	0.0031007	422218	-0.0732376	0.0142547	TRUE	0.000162411	67.826
rs74802478			G	0.0166419	0.00281818	422218	-0.016719	0.0125013	TRUE	7.71565e-05	32.2193
rs749671			G	0.015654	0.00223821	422218	-0.0145757	0.00989897	TRUE	0.000125633	52.4649
rs7564130			T	-0.0149864	0.00225071	422218	0.0247902	0.00977378	TRUE	0.000111634	46.6183
rs7693703			G	0.0228437	0.0038412	422218	-0.0278646	0.0164099	TRUE	8.322e-05	34.7516
rs7716447			A	-0.0133844	0.00226863	422218	-0.0114048	0.0116885	TRUE	9.28548e-05	38.7753
rs7788008			G	0.0126792	0.0021785	422218	0.000699755	0.0092044	TRUE	8.43041e-05	35.2043
rs7834121			G	-0.0139595	0.00216371	422218	0.0153811	0.00981256	TRUE	0.000103136	43.0691
rs78394231			T	-0.0208531	0.00363518	422218	0.00329457	0.0165277	TRUE	0.000102601	42.8456
rs801733			A	0.0168585	0.00225323	422218	-0.0160786	0.0101311	TRUE	0.000144088	60.1728
rs8756			C	-0.0134501	0.00216618	422218	-0.0301294	0.00965255	TRUE	9.62184e-05	40.1801
rs9471333			C	0.0131038	0.00216935	422218	-0.00313491	0.0095495	TRUE	0.000104861	43.7896
rs9563168			G	0.0175868	0.00266741	422218	-0.0294185	0.0115842	TRUE	0.000110774	46.2589
rs9569734			A	0.0188846	0.00300692	422218	-0.0464	0.0128374	TRUE	0.000111192	46.4335
rs9718104			T	-0.0407684	0.00461017	422218	0.00757126	0.0208802	TRUE	0.000180533	75.3957
rs9834970			T	0.0127684	0.00215775	422218	-0.0583709	0.00950897	TRUE	8.92115e-05	37.2538
rs984409			G	-0.0148683	0.00225294	422218	0.0148886	0.0102005	TRUE	0.000105797	44.1803
rs9867121			C	0.0194994	0.00280905	422218	-0.0144032	0.0124311	TRUE	0.000114637	47.8725
rs9902312			T	0.0153237	0.00232706	422218	-0.0183473	0.0101042	TRUE	9.79427e-05	40.9002
rs9964724			C	0.0176465	0.00232664	422218	0.0167588	0.0102186	TRUE	0.000170406	71.1653
										0.0111931

## Sheet: com_SCZ
etable5. Top SNPs for Computer use (P <1e08) on SCZ
Notes: Estimated variance explained by genetic instruments was the sum of estimated variance explained by each variant calculated from original study.
SNP	Proxy SNP	r2 for proxy	effect allele	beta (exposure)	se (exposure)	samplesize (exposure)	beta (outcome)	se (outcome)	mr_keep	estimated variance (%)	F	Phenotype
rs10208088			C	0.0131026	0.00223225	422218	-0.0252152	0.0100373	TRUE	9.20716e-05	38.2062	Com
rs113851275			G	-0.0209442	0.00353742	422218	0.00279609	0.0154952	TRUE	8.60182e-05	35.6941	Com
rs11708955			T	-0.0157497	0.00238749	422218	-0.0135109	0.0105426	TRUE	0.000113732	47.1956	Com
rs11749912			A	0.0139203	0.00223731	422218	-0.021193	0.00960175	TRUE	9.48179e-05	39.346	Com
rs13262595			A	-0.0157346	0.00221517	422218	0.0816721	0.00961485	TRUE	0.000123245	51.1435	Com
rs1448355			C	-0.0146118	0.00227388	422218	0.0221528	0.0100105	TRUE	9.82547e-05	40.7723	Com
rs166835			C	0.0131356	0.00222179	422218	0.00159872	0.00982967	TRUE	8.9592e-05	37.1772	Com
rs17789218			T	-0.0150545	0.00256134	422218	0.0217615	0.0120999	TRUE	8.5679e-05	35.5533	Com
rs2068625			T	-0.0158375	0.00239755	422218	-0.013744	0.0106103	TRUE	0.000107989	44.8119	Com
rs206965			T	0.0156007	0.00271472	422218	-0.0232789	0.0122258	TRUE	8.18572e-05	33.9673	Com
rs2345941			A	0.014647	0.00221726	422218	-0.00995943	0.00950842	TRUE	0.000116445	48.3216	Com
rs2734849			A	-0.0135145	0.00220049	422218	0.0334348	0.00966159	TRUE	9.70022e-05	40.2524	Com
rs2748985			T	-0.0153444	0.00221274	422218	-0.00754842	0.00990258	TRUE	0.00012213	50.6808	Com
rs34597645			C	0.0157341	0.00273529	422218	0.0158002	0.0115225	TRUE
rs35933007			G	-0.0151917	0.00264445	422218	0.01262	0.013328	TRUE	8.79236e-05	36.4848	Com
rs4073003			A	0.0201634	0.00331978	422218	0.0745507	0.0142676	TRUE	9.54383e-05	39.6034	Com
rs4977839			G	-0.0199181	0.00223302	422218	0.0185273	0.00976164	TRUE	0.000201119	83.4659	Com
rs55772938			A	-0.0151223	0.00241703	422218	-0.00330546	0.0105172	TRUE	0.000102105	42.3703	Com
rs6744254			C	-0.0159012	0.00220373	422218	-0.00489195	0.00943456	TRUE	0.000126521	52.5033	Com
rs6774533			C	-0.0149436	0.00245831	422218	0.0268367	0.0102441	TRUE	9.1403e-05	37.9288	Com
rs73578186			C	0.0149904	0.00236483	422218	0.0018982	0.0101743	TRUE	9.66326e-05	40.099	Com
rs9372625			G	-0.0183911	0.00227197	422218	-0.020417	0.00988095	TRUE	0.000164531	68.2793	Com
rs984409			G	0.00201625	0.00229668	422218	0.0148886	0.0102005	TRUE	0.000105797	44.1803	TV
										0.0023803

## Sheet: drv_SCZ
etable6. Top SNPs for Driving (P <1e08) on SCZ
Notes: Estimated variance explained by genetic instruments was the sum of estimated variance explained by each variant calculated from original study.
SNP	Proxy SNP	r2 for proxy	effect allele	beta (exposure)	se (exposure)	samplesize (exposure)	beta (outcome)	se (outcome)	mr_keep	estimated variance (%)	F	Phenotype
rs10186876			A	0.0144048	0.00233801	422218	0.00518653	0.0100027	TRUE	9.81272e-05	40.6819	Drv
rs1198575			T	0.0189685	0.00282745	422218	-0.0859174	0.0124313	TRUE	0.000111405	46.1872	Drv
rs4765541			T	0.0137597	0.00235511	422218	-0.0470392	0.0101359	TRUE	8.47533e-05	35.1369	Drv
rs6012558			G	0.0144779	0.00226377	422218	-0.0225422	0.00976704	TRUE	0.000101472	42.0689	Drv
										0.000395758

## Sheet: tel_MDD
etable7. Top SNPs for Television watching (P <1e08) on MDD
Notes: Estimated variance explained by genetic instruments was the sum of estimated variance explained by each variant calculated from original study.
SNP	Proxy SNP	r2 for proxy	effect allele	beta (exposure)	se (exposure)	samplesize (exposure)	beta (outcome)	se (outcome)	mr_keep	estimated variance (%)	F
rs10041724			T	0.0180931	0.00273852	422218	-0.0041	0.0055	TRUE	0.00011819	49.3563
rs10054327			G	0.0172449	0.00219021	422218	-0.0096	0.0044	TRUE	0.000156878	65.5149
rs10189857			A	-0.020463	0.00217999	422218	0.0028	0.0043	TRUE	0.000228184	95.3006
rs1031423			T	-0.0185194	0.00262613	422218	-0.0252	0.0052	TRUE	0.00012183	50.8764
rs10771746			C	-0.0142821	0.00239463	422218	0.0073	0.0048	TRUE	9.60745e-05	40.12
rs10772643			C	0.0247995	0.00349653	422218	-0.0007	0.0069	TRUE	0.000116853	48.7981
rs10876864			G	-0.0133403	0.0021844	422218	-0.0015	0.0043	TRUE	9.57366e-05	39.9788
rs10932837			C	-0.0131055	0.00216152	422218	0.0098	0.0043	TRUE	9.40952e-05	39.2933
rs10947452			T	0.0140576	0.00227421	422218	0.0053	0.0045	TRUE	9.46285e-05	39.516
rs11130793			C	0.0129223	0.00221055	422218	-0.0013	0.0044	TRUE	9.51157e-05	39.7195
rs11218575			C	0.0153751	0.00218733	422218	0.0095	0.0044	TRUE	0.000110375	46.0925
rs11245482			T	-0.0132329	0.00222132	422218	0.0011	0.0044	TRUE	8.79458e-05	36.7252
rs114720649			C	-0.0135456	0.00221865	422218	0.0028	0.0046	TRUE
rs11689199			A	0.0184644	0.00220443	422218	0.003	0.0044	TRUE	0.000181048	75.6107
rs11714337			G	0.0144017	0.00218888	422218	0.0084	0.0044	TRUE	0.000127044	53.054
rs11917871			T	-0.0166474	0.00220627	422218	0.0039	0.0044	TRUE	0.0001205	50.321
rs12105701			C	-0.0128825	0.00220843	422218	-0.0133	0.0044	TRUE	7.30392e-05	30.4999
rs12342024			G	-0.0205172	0.00340797	422218	-0.0035	0.0069	TRUE	8.59574e-05	35.8948
rs1243182			C	-0.0185916	0.00234162	422218	-0.0075	0.0046	TRUE	0.00016123	67.3328
rs12491503			G	-0.0142607	0.00229906	422218	-0.0112	0.0046	TRUE	9.14285e-05	38.1797
rs12554512			T	0.0207024	0.00219328	422218	0.001	0.0044	TRUE	0.0002412	100.738
rs13107325			C	-0.0291705	0.00412256	422218	-0.0242	0.0084	TRUE	0.000135778	56.7019
rs1451533			G	-0.0157043	0.00243314	422218	-0.0203	0.0048	TRUE	0.000103795	43.3443
rs148544378			C	0.0531894	0.00757316	422218	0.0234	0.0157	TRUE	0.000130347	54.4337
rs148648822			G	-0.017551	0.00298724	422218	0.0107	0.0062	TRUE	8.28667e-05	34.604
rs17207890			G	0.015694	0.00228666	422218	0.0019	0.0045	TRUE	0.00012556	52.4345
rs17727474			C	0.017551	0.00296085	422218	-0.0026	0.0059	TRUE	8.69116e-05	36.2933
rs17789218			T	0.0185965	0.00251401	422218	0.0182	0.005	TRUE	0.000136465	56.9889
rs182355396			C	-0.0802623	0.0126343	422218	0.028	0.0262	TRUE	0.000123554	51.5964
rs1913808			G	0.0149234	0.0023854	422218	-0.0075	0.0047	TRUE	8.724e-05	36.4304
rs2034768			A	0.0147356	0.00215816	422218	0.0055	0.0043	TRUE	0.00011983	50.0412
rs2045147			A	0.0126686	0.00217659	422218	0.0062	0.0043	TRUE	6.84294e-05	28.5748
rs2073869			C	0.0186112	0.0029076	422218	-0.0026	0.0058	TRUE	0.000104681	43.7145
rs2173650			G	0.017845	0.00304387	422218	0.0037	0.006	TRUE	8.9116e-05	37.2139
rs2184364			A	0.0156396	0.00263677	422218	0.0152	0.0053	TRUE	8.96544e-05	37.4387
rs2291681			G	0.0127084	0.00220239	422218	0.0108	0.0044	TRUE	7.73357e-05	32.2942
rs2447098			C	-0.014947	0.00217845	422218	0.0046	0.0044	TRUE	0.000118899	49.6525
rs2460			G	-0.0152938	0.00245865	422218	0.0108	0.0049	TRUE	0.000101546	42.4052
rs2616830			G	0.0164651	0.00216551	422218	-0.0019	0.0043	TRUE	0.000127012	53.041
rs262890			A	-0.0185683	0.00235563	422218	0.0063	0.0047	TRUE	0.000154282	64.4306
rs263771			C	-0.017013	0.00256135	422218	-0.0146	0.0052	TRUE	0.0001239	51.7409
rs2971640			G	-0.0126576	0.00215401	422218	0.0005	0.0043	TRUE	9.05157e-05	37.7984
rs303753			G	-0.0144597	0.00229051	422218	0.006	0.0046	TRUE	0.000108448	45.2874
rs34811474			G	0.0152829	0.00255709	422218	0.0071	0.0051	TRUE	9.89474e-05	41.3198
rs34864022			A	-0.0263815	0.00435706	422218	-0.016	0.0087	TRUE	9.14389e-05	38.184
rs374722			G	0.0244932	0.0030238	422218	-0.0058	0.006	TRUE	0.000178961	74.7389
rs3754970			T	-0.014997	0.0021699	422218	-0.0062	0.0043	TRUE	0.000146342	61.1145
rs3796386			G	-0.0261712	0.0021795	422218	-0.0094	0.0044	TRUE	0.000393335	164.302
rs4382592			T	0.0136721	0.00235776	422218	0.0076	0.0047	TRUE	9.15286e-05	38.2215
rs4577309			A	0.0160037	0.00216796	422218	-0.0042	0.0043	TRUE	0.000123905	51.7433
rs4845364			A	-0.0153008	0.00215604	422218	-0.0028	0.0043	TRUE	0.000129079	53.9041
rs4973576			C	-0.0145232	0.00237947	422218	-0.0054	0.0048	TRUE	8.93216e-05	37.2997
rs56103247			C	0.0297647	0.00475247	422218	0.0036	0.0097	TRUE	9.35251e-05	39.0552
rs56398417			C	0.0144253	0.00232895	422218	-0.0049	0.0047	TRUE	0.0001043	43.5553
rs56858768			G	-0.0148792	0.00236956	422218	-0.0106	0.0047	TRUE	0.000103885	43.3818
rs57585211			T	-0.0167329	0.00285006	422218	0.0116	0.0057	TRUE	8.21476e-05	34.3037
rs6131281			C	0.0160808	0.00220553	422218	0.0024	0.0044	TRUE	0.000132752	55.4381
rs6141814			C	-0.0135023	0.00222588	422218	-0.0042	0.0044	TRUE	9.33509e-05	38.9825
rs62332760			G	-0.0144128	0.00221698	422218	0.0062	0.0044	TRUE	0.00010249	42.7992
rs62379379			G	-0.0260246	0.0042322	422218	0.0014	0.0085	TRUE	8.77013e-05	36.6231
rs62641636			A	0.0144237	0.00233911	422218	-0.003	0.0047	TRUE	0.000101957	42.5768
rs6472942			T	-0.0131633	0.00218761	422218	-0.0035	0.0044	TRUE	8.53488e-05	35.6406
rs648044			A	-0.013834	0.00226591	422218	0.0036	0.0046	TRUE	0.000107849	45.0376
rs6673341			T	-0.014513	0.0021693	422218	-0.0078	0.0043	TRUE	0.000113288	47.3088
rs66852340			C	-0.0177896	0.00260074	422218	-0.0117	0.0054	TRUE	0.000124026	51.7936
rs6721975			T	-0.0166905	0.00261401	422218	-0.0168	0.0053	TRUE	0.000107069	44.7117
rs6797840			A	-0.0161032	0.00218412	422218	0.0083	0.0043	TRUE	0.00013498	56.3689
rs6825241			C	-0.0169583	0.00216609	422218	-0.0049	0.0043	TRUE	0.000151773	63.3827
rs6850494			A	-0.0143297	0.00222236	422218	0.0062	0.0044	TRUE	0.000107751	44.9966
rs6905544			A	-0.0189935	0.00221031	422218	0.0065	0.0044	TRUE	0.000222222	92.8099
rs7184800			G	0.0168167	0.00234935	422218	-0.0024	0.0047	TRUE	0.000138284	57.7487
rs7189927			T	0.0149741	0.00225865	422218	0.0007	0.0045	TRUE	0.000116723	48.7435
rs7248205			C	0.0139253	0.00221689	422218	-0.0059	0.0044	TRUE	0.000108777	45.425
rs72725224			A	-0.0464317	0.007876	422218	0.01	0.0158	TRUE	7.37204e-05	30.7844
rs72781699			G	-0.0186804	0.00267802	422218	0	0.0053	TRUE	0.000142439	59.4842
rs72828890			C	0.0192918	0.00329837	422218	-0.0038	0.0066	TRUE	9.50643e-05	39.698
rs72834698			G	0.0226559	0.0031007	422218	-0.0099	0.0062	TRUE	0.000162411	67.826
rs74802478			G	0.0166419	0.00281818	422218	0.0015	0.0056	TRUE	7.71565e-05	32.2193
rs749671			G	0.015654	0.00223821	422218	-0.0059	0.0044	TRUE	0.000125633	52.4649
rs7564130			T	-0.0149864	0.00225071	422218	0.0031	0.0045	TRUE	0.000111634	46.6183
rs7693703			G	0.0228437	0.0038412	422218	-0.0069	0.0076	TRUE	8.322e-05	34.7516
rs7716447			A	-0.0133844	0.00226863	422218	0.0048	0.0048	TRUE	9.28548e-05	38.7753
rs7788008			G	0.0126792	0.0021785	422218	0.0016	0.0043	TRUE	8.43041e-05	35.2043
rs78394231			T	-0.0208531	0.00363518	422218	-0.0037	0.0072	TRUE	0.000102601	42.8456
rs801733			A	0.0168585	0.00225323	422218	-0.0003	0.0045	TRUE	0.000144088	60.1728
rs8756			C	-0.0134501	0.00216618	422218	-0.0133	0.0043	TRUE	9.62184e-05	40.1801
rs9471333			C	0.0131038	0.00216935	422218	-0.0026	0.0043	TRUE	0.000104861	43.7896
rs9563168			G	0.0175868	0.00266741	422218	0.0029	0.0053	TRUE	0.000110774	46.2589
rs9569734			A	0.0188846	0.00300692	422218	-0.0018	0.006	TRUE	0.000111192	46.4335
rs9718104			T	-0.0407684	0.00461017	422218	0.0013	0.0092	TRUE	0.000180533	75.3957
rs9834970			T	0.0127684	0.00215775	422218	-0.0055	0.0043	TRUE	8.92115e-05	37.2538
rs984409			G	-0.0148683	0.00225294	422218	-0.0217	0.0045	TRUE	0.000105797	44.1803
rs9867121			C	0.0194994	0.00280905	422218	0.0147	0.0056	TRUE	0.000114637	47.8725
rs9902312			T	0.0153237	0.00232706	422218	-0.0086	0.0046	TRUE	9.79427e-05	40.9002
rs9964724			C	0.0176465	0.00232664	422218	0.0279	0.0046	TRUE	0.000170406	71.1653
										0.0111233

## Sheet: com_MDD
etable8. Top SNPs for Computer use (P <1e08) on MDD
Notes: Estimated variance explained by genetic instruments was the sum of estimated variance explained by each variant calculated from original study.
SNP	Proxy SNP	r2 for proxy	effect allele	beta (exposure)	se (exposure)	samplesize (exposure)	beta (outcome)	se (outcome)	mr_keep	estimated variance (%)	F
rs10208088			C	0.0131026	0.00223225	422218	0.0061	0.0044	TRUE	9.20716e-05	38.2062
rs113851275			G	-0.0209442	0.00353742	422218	-0.0224	0.0069	TRUE	8.60182e-05	35.6941
rs11708955			T	-0.0157497	0.00238749	422218	0.0096	0.0047	TRUE	0.000113732	47.1956
rs11749912			A	0.0139203	0.00223731	422218	0.0196	0.0044	TRUE	9.48179e-05	39.346
rs13262595			A	-0.0157346	0.00221517	422218	0.0148	0.0043	TRUE	0.000123245	51.1435
rs1448355			C	-0.0146118	0.00227388	422218	0.0042	0.0044	TRUE	9.82547e-05	40.7723
rs166835			C	0.0131356	0.00222179	422218	0.0119	0.0043	TRUE	8.9592e-05	37.1772
rs17789218			T	-0.0150545	0.00256134	422218	0.0182	0.005	TRUE	8.5679e-05	35.5533
rs2068625			T	-0.0158375	0.00239755	422218	0.0159	0.0047	TRUE	0.000107989	44.8119
rs206965			T	0.0156007	0.00271472	422218	0.0004	0.0053	TRUE	8.18572e-05	33.9673
rs2345941			A	0.014647	0.00221726	422218	-0.0058	0.0043	TRUE	0.000116445	48.3216
rs2734849			A	-0.0135145	0.00220049	422218	0.0194	0.0043	TRUE	9.70022e-05	40.2524
rs2748985			T	-0.0153444	0.00221274	422218	-0.001	0.0044	TRUE	0.00012213	50.6808
rs35933007			G	-0.0151917	0.00264445	422218	-0.0032	0.0053	TRUE	8.79236e-05	36.4848
rs4073003			A	0.0201634	0.00331978	422218	-0.0017	0.0064	TRUE	9.54383e-05	39.6034
rs4977839			G	-0.0199181	0.00223302	422218	0.0003	0.0044	TRUE	0.000201119	83.4659
rs55772938			A	-0.0151223	0.00241703	422218	0	0.0047	TRUE	0.000102105	42.3703
rs6744254			C	-0.0159012	0.00220373	422218	-0.009	0.0043	TRUE	0.000126521	52.5033
rs6774533			C	-0.0149436	0.00245831	422218	-0.009	0.0048	TRUE	9.1403e-05	37.9288
rs73578186			C	0.0149904	0.00236483	422218	-0.0086	0.0046	TRUE	9.66326e-05	40.099
rs9372625			G	-0.0183911	0.00227197	422218	-0.0017	0.0044	TRUE	0.000164531	68.2793
rs984409			G	0.00201625	0.00229668	422218	-0.0217	0.0045	TRUE
										0.00227451

## Sheet: drv_MDD
etable9. Top SNPs for Driving (P <1e08) on MDD
Notes: Estimated variance explained by genetic instruments was the sum of estimated variance explained by each variant calculated from original study.
SNP	Proxy SNP	r2 for proxy	effect allele	beta (exposure)	se (exposure)	samplesize (exposure)	beta (outcome)	se (outcome)	mr_keep	estimated variance (%)	F	Phenotype
rs10186876			A	0.0144048	0.00233801	422218	0	0.0045	TRUE	9.81272e-05	40.6819	Drv
rs1198575			T	0.0189685	0.00282745	422218	0.0191	0.0056	TRUE	0.000111405	46.1872	Drv
rs4765541			T	0.0137597	0.00235511	422218	-0.0135	0.0045	TRUE	8.47533e-05	35.1369	Drv
rs6012558			G	0.0144779	0.00226377	422218	-0.0104	0.0044	TRUE	0.000101472	42.0689	Drv
										0.000395758
