# Supplementary material for: Assessment of Bidirectional Relationships between Leisure Sedentary Behaviors and Neuropsychiatric Disorders: A Two-Sample Mendelian Randomization Study
Source: Genes (Basel). 2022 May 27;13(6):962. doi: 10.3390/genes13060962 (PMC9223103; doi:10.3390/genes13060962)
Supplement: Supplementary file 1 [file genes-13-00962-s001.zip › Supplementary_Data_S2.xlsx]

## Sheet: AD_tel
etable1. Top SNPs for Television watching (P <1e08) on AD
Notes: Estimated variance explained by genetic instruments was the sum of estimated variance explained by each variant calculated from reported P values, sample size, and the proportation of cases and controls using the TwoSampleMR R functions get_r_from_lor() and get_r_from_pn().
SNP	Proxy SNP	r2 for proxy	effect_allele.exposure	beta.exposure	se.exposure	beta.outcome	se.outcome	mr_keep	samplesize.exposure	estimate dvariance (%)
rs114812713			G	0.277632	0.0377792	-0.00148377	0.00681017	TRUE	63926	0.000290537
rs138190086			G	0.262364	0.0448703	-0.0093639	0.00791165	TRUE	63926	0.000231205
rs593742			A	0.0725706	0.0125318	-0.00209425	0.00235244	TRUE	63926	0.000228982
rs7920721			A	0.076961	0.0114764	0.00478273	0.00223286	TRUE	63926	0.000265143
										0.00101587

## Sheet: AD_com
etable2. Top SNPs for Computer use (P <1e08) on AD
Notes: Estimated variance explained by genetic instruments was the sum of estimated variance explained by each variant calculated from reported P values, sample size, and the proportation of cases and controls using the TwoSampleMR R functions get_r_from_lor() and get_r_from_pn().
SNP	Proxy SNP	r2 for proxy	effect_allele.exposure	beta.exposure	beta.outcome	se.outcome	se.exposure	mr_keep	samplesize.exposure	estimate dvariance (%)
rs114812713			G	0.277632	-0.00924369	0.00693749	0.0377792	TRUE	63926	0.000290537
rs138190086			G	0.262364	-0.0140744	0.00805222	0.0448703	TRUE	63926	0.000231205
rs593742			A	0.0725706	6.65e-05	0.00239347	0.0125318	TRUE	63926	0.000228982
rs7920721			A	0.076961	0.00504849	0.00227397	0.0114764	TRUE	63926	0.000265143
										0.00101587

## Sheet: AD_drv
etable3. Top SNPs for Driving (P <1e08) on AD
Notes: Estimated variance explained by genetic instruments was the sum of estimated variance explained by each variant calculated from reported P values, sample size, and the proportation of cases and controls using the TwoSampleMR R functions get_r_from_lor() and get_r_from_pn().
SNP	Proxy SNP	r2 for proxy	effect_allele.exposure	beta.exposure	beta.outcome	se.outcome	se.exposure	mr_keep	samplesize.exposure	estimate dvariance (%)
rs114812713			G	0.277632	0.00455858	0.00702285	0.0377792	FALSE	63926	0.000290537
rs138190086			G	0.262364	-0.00339974	0.00814553	0.0448703	TRUE	63926	0.000231205
rs593742			A	0.0725706	-0.00283183	0.00242082	0.0125318	TRUE	63926	0.000228982
rs7920721			A	0.076961	-0.0011099	0.00229995	0.0114764	TRUE	63926	0.000265143
										0.00101587

## Sheet: SCZ_tel
etable4. Top SNPs for Television watching (P <1e08) on SCZ
Notes: Estimated variance explained by genetic instruments was the sum of estimated variance explained by each variant calculated from reported P values, sample size, and the proportation of cases and controls using the TwoSampleMR R functions get_r_from_lor() and get_r_from_pn().
SNP	Proxy SNP	r2 for proxy	effect_allele.exposure	beta.exposure	beta.outcome	se.outcome	se.exposure	mr_keep	samplesize.exposure	estimate dvariance (%)
rs10083370			G	0.0751075	-0.0021702	0.00219776	0.00990787	TRUE	105318	0.000233527
rs10156310			A	0.0727857	-0.00528552	0.00254201	0.011735	FALSE	105318	0.000191089
rs10196799			A	0.0560967	-0.00233503	0.0021659	0.00956578	FALSE	105318	0.000180675
rs10650434			A	-0.0853999	0.000614519	0.00218018	0.00967743	TRUE	105318	0.000271825
rs111294930			A	0.082317	-0.00918402	0.00238178	0.0120682	TRUE	105318	0.000210139
rs11409090			A	-0.0598997	-0.00170841	0.00223484	0.0100017	TRUE	105318	0.000184514
rs11646127			G	0.070738	0.0033639	0.00217037	0.00980859	FALSE	105318	0.000222173
rs11685299			C	0.0603422	-0.000504863	0.00231901	0.0102447	TRUE	105318	0.000181469
rs11783093			C	0.093126	0.00041373	0.00295013	0.0136047	TRUE	105318	0.000210882
rs1191551			T	0.0728786	3.71e-05	0.00257796	0.0116617	TRUE	105318	0.000192536
rs12129573			C	-0.0764492	-0.00521554	0.00226521	0.00985997	TRUE	105318	0.000238851
rs12293670			A	0.0807502	-0.00320107	0.00231331	0.0101426	TRUE	105318	0.000245254
rs12416331			T	0.145485	-0.0109653	0.0040657	0.0168904	FALSE	105318	0.000265324
rs12704290			G	0.113953	-0.0070874	0.00338257	0.0150418	TRUE	105318	0.000233379
rs12705761			G	0.0655068	-0.00776535	0.00227095	0.00997409	FALSE	105318	0.000202338
rs12898315			G	-0.0568984	0.00664321	0.00217398	0.00954543	TRUE	105318	0.000183647
rs12908161			A	0.0666301	-0.00886953	0.00246103	0.0108889	TRUE	105318	0.000188523
rs12991836			A	-0.0610353	0.00787469	0.0022593	0.00987822	TRUE	105318	0.00019036
rs13107325			C	-0.159606	-0.0291705	0.00412256	0.0192665	TRUE	105318	0.000255186
rs13169274			T	-0.0596439	-0.00259144	0.00219353	0.009675	TRUE	105318	0.000189928
rs1319017			G	-0.0664069	0.00139488	0.00228643	0.0102101	TRUE	105318	0.000200377
rs1339227			C	0.0626931	0.0040818	0.00230489	0.010009	TRUE	105318	0.000192975
rs139425113			G	-0.0666004	0.00216101	0.00275669	0.0115652	TRUE	105318	0.000177423
rs140505938			C	0.0836976	-0.000286698	0.00288863	0.0135481	TRUE	105318	0.00019033
rs14403			C	0.0741794	0.0100271	0.00259675	0.0116171	TRUE	105318	0.000196722
rs1451488			A	-0.0671446	0.000683378	0.00217814	0.00971301	TRUE	105318	0.000212967
rs1473594			T	0.0640071	-0.00275215	0.0022052	0.00965244	TRUE	105318	0.000204293
rs16867576			A	0.101021	0.00081886	0.00314748	0.0150015	TRUE	105318	0.000207461
rs16902086			A	-0.0659689	0.00487155	0.00229536	0.0100633	TRUE	105318	0.000201959
rs17514846			A	-0.0688143	-0.00397908	0.0021831	0.00982988	TRUE	105318	0.000215666
rs1899543			A	-0.0576609	-0.00037169	0.00215696	0.0094895	FALSE	105318	0.000187204
rs2007044			A	-0.0886891	0.0027552	0.00221754	0.00969152	TRUE	105318	0.000281876
rs2053079			A	-0.0707229	0.000466453	0.00251159	0.0110924	TRUE	105318	0.000196428
rs211829			T	0.0590233	-0.000374114	0.00222223	0.0098771	TRUE	105318	0.000184108
rs217287			C	0.0690595	-0.00978521	0.00222408	0.00967609	TRUE	105318	0.000219873
rs2332700			C	0.0699924	-0.00370327	0.00250226	0.0109306	FALSE	105318	0.000197277
rs2514218			C	0.0725067	-0.00693653	0.00226843	0.0103465	TRUE	105318	0.000215892
rs2660304			G	-0.108265	0.0179434	0.00275446	0.0123766	TRUE	105318	0.000269453
rs2851447			G	0.0871864	-0.0139748	0.00251807	0.0107653	FALSE	105318	0.000249482
rs2905432			G	0.0685928	0.004475	0.00226974	0.00999076	TRUE	105318	0.000211512
rs2949006			T	0.100117	0.00189755	0.0027185	0.011887	TRUE	105318	0.000259442
rs2970610			T	0.0678455	0.0059138	0.00230108	0.0100379	TRUE	105318	0.000208227
rs3130820			T	0.247329	0.00472606	0.00331506	0.017694	FALSE	105318	0.000430328
rs34796896			G	0.0832376	0.00168124	0.00267305	0.0119438	TRUE	105318	0.000214698
rs35346733			G	-0.0869423	0.00690241	0.00274358	0.0124064	TRUE	105318	0.000215892
rs35774874			T	0.0689662	-0.00289521	0.00216281	0.0102808	TRUE	105318	0.000206665
rs36043959			G	-0.0803319	-0.00497463	0.00267283	0.011584	TRUE	105318	0.00021364
rs3617			C	0.0652258	-0.000622202	0.00217084	0.00958488	TRUE	105318	0.000209648
rs3735025			T	0.0645698	-0.00882329	0.00226183	0.00990299	TRUE	105318	0.000200876
rs3743078			C	-0.078167	-7.74e-05	0.00257086	0.0112105	FALSE	105318	0.000214808
rs4144797			T	0.0817643	-0.0110212	0.00227381	0.0100584	TRUE	105318	0.00025041
rs42945			A	-0.0631315	0.00320416	0.00217569	0.00995258	TRUE	105318	0.000195425
rs4648845			C	-0.0763844	0.000974413	0.00216794	0.0111298	TRUE	105318	0.000211433
rs4766428			C	-0.0761686	0.00122903	0.00219365	0.0100052	TRUE	105318	0.000234522
rs4936215			A	0.0913022	0.00335873	0.00265026	0.0121351	TRUE	105318	0.000231779
rs56807175			T	-0.0876003	-0.000911954	0.00279978	0.0129552	TRUE	105318	0.000208315
rs5757730			A	-0.0712275	-0.00022361	0.00217344	0.0100999	TRUE	105318	0.00021726
rs6002655			C	-0.0750577	-0.00682567	0.00220531	0.0098226	TRUE	105318	0.000235397
rs6065094			A	-0.0850896	0.00419037	0.00231024	0.0102117	TRUE	105318	0.000256678
rs61937595			C	0.124957	-0.0132517	0.00377233	0.0188375	TRUE	105318	0.000204362
rs62334820			C	-0.0811124	-0.0124564	0.00269024	0.0119066	TRUE	105318	0.000209873
rs6434928			G	0.0729716	-0.00944691	0.00229345	0.0100387	TRUE	105318	0.000223935
rs6694545			A	0.0767758	0.000379297	0.00251268	0.0111674	TRUE	105318	0.0002118
rs7010876			T	0.0621294	-0.00342012	0.00247891	0.0107062	FALSE	105318	0.00017879
rs704373			A	0.0645698	-0.00116937	0.00232868	0.0100623	TRUE	105318	0.000197696
rs7129727			G	-0.0625352	-0.00709561	0.00230133	0.0103405	TRUE	105318	0.000186321
rs7191183			T	-0.0595271	0.00595036	0.00236876	0.0102486	TRUE	105318	0.000178951
rs7216638			T	0.0645698	0.000239801	0.00226279	0.0103601	FALSE	105318	0.000192015
rs7432375			G	0.0678455	0.000966757	0.00220148	0.00978345	TRUE	105318	0.00021364
rs7499750			A	0.0705517	-0.0109278	0.00259393	0.0112974	TRUE	105318	0.000192398
rs7508148			T	0.0771462	-0.00491973	0.00253336	0.0116855	TRUE	105318	0.00020339
rs7596038			C	0.0671912	-0.000683328	0.00218633	0.009584	TRUE	105318	0.000215982
rs75968099			C	-0.0657446	0.00791903	0.00227511	0.0101518	TRUE	105318	0.000199518
rs7701440			T	-0.0723987	-0.0107868	0.00215971	0.00956335	TRUE	105318	0.000233214
rs7789569			T	0.0652258	0.00277013	0.00226322	0.0100029	TRUE	105318	0.000200889
rs7801375			A	-0.0773455	0.00637737	0.00294964	0.0133139	TRUE	105318	0.000178984
rs7893279			T	0.111273	0.00174765	0.00338645	0.0153887	TRUE	105318	0.000222758
rs7951870			T	-0.0933222	0.00800051	0.00287182	0.0127929	TRUE	105318	0.000224729
rs9607782			T	-0.0811233	-0.00464889	0.00249226	0.0112494	FALSE	105318	0.000222158
										0.0169917

## Sheet: SCZ_com
etable5. Top SNPs for Computer use (P <1e08) on SCZ
Notes: Estimated variance explained by genetic instruments was the sum of estimated variance explained by each variant calculated from reported P values, sample size, and the proportation of cases and controls using the TwoSampleMR R functions get_r_from_lor() and get_r_from_pn().
SNP	Proxy SNP	r2 for proxy	effect_allele.exposure	beta.exposure	beta.outcome	se.outcome	se.exposure	mr_keep	samplesize.exposure	estimate dvariance (%)
rs10083370			G	0.0751075	0.00444393	0.00223662	0.00990787	TRUE	105318	0.000233527
rs10156310			A	0.0727857	0.00450416	0.00258866	0.011735	FALSE	105318	0.000191089
rs10196799			A	0.0560967	0.00549326	0.00220894	0.00956578	FALSE	105318	0.000180675
rs10650434			A	-0.0853999	0.00602856	0.00222062	0.00967743	TRUE	105318	0.000271825
rs111294930			A	0.082317	-0.00321858	0.00242702	0.0120682	TRUE	105318	0.000210139
rs11409090			A	-0.0598997	0.000981162	0.00227769	0.0100017	TRUE	105318	0.000184514
rs11646127			G	0.070738	-0.000855757	0.00220822	0.00980859	FALSE	105318	0.000222173
rs11685299			C	0.0603422	0.00186022	0.00236475	0.0102447	TRUE	105318	0.000181469
rs11783093			C	0.093126	-0.00146096	0.00300546	0.0136047	TRUE	105318	0.000210882
rs1191551			T	0.0728786	-0.00297765	0.00262383	0.0116617	TRUE	105318	0.000192536
rs12129573			C	-0.0764492	-0.000120694	0.00230872	0.00985997	TRUE	105318	0.000238851
rs12293670			A	0.0807502	0.00143166	0.00235517	0.0101426	TRUE	105318	0.000245254
rs12416331			T	0.145485	-0.00449507	0.00413897	0.0168904	FALSE	105318	0.000265324
rs12704290			G	0.113953	0.00328569	0.00344632	0.0150418	TRUE	105318	0.000233379
rs12705761			G	0.0655068	-0.00683923	0.00231251	0.00997409	FALSE	105318	0.000202338
rs12898315			G	-0.0568984	0.00122356	0.00221217	0.00954543	TRUE	105318	0.000183647
rs12908161			A	0.0666301	-0.00190562	0.002504	0.0108889	TRUE	105318	0.000188523
rs12991836			A	-0.0610353	0.00109676	0.00230402	0.00987822	TRUE	105318	0.00019036
rs13107325			C	-0.159606	-0.00127609	0.0041993	0.0192665	TRUE	105318	0.000255186
rs13169274			T	-0.0596439	-0.00684383	0.00223531	0.009675	TRUE	105318	0.000189928
rs1319017			G	-0.0664069	0.00470227	0.00232812	0.0102101	TRUE	105318	0.000200377
rs1339227			C	0.0626931	0.00337627	0.00234829	0.010009	TRUE	105318	0.000192975
rs139425113			G	-0.0666004	0.00309072	0.00280781	0.0115652	TRUE	105318	0.000177423
rs140505938			C	0.0836976	-0.00693969	0.00294427	0.0135481	TRUE	105318	0.00019033
rs14403			C	0.0741794	-0.00113357	0.00264668	0.0116171	TRUE	105318	0.000196722
rs1451488			A	-0.0671446	0.00201794	0.00222118	0.00971301	TRUE	105318	0.000212967
rs1473594			T	0.0640071	-0.00447015	0.00224632	0.00965244	TRUE	105318	0.000204293
rs16867576			A	0.101021	0.00375128	0.00320705	0.0150015	TRUE	105318	0.000207461
rs16902086			A	-0.0659689	-0.00719755	0.00233939	0.0100633	TRUE	105318	0.000201959
rs17514846			A	-0.0688143	-0.0110202	0.00222164	0.00982988	TRUE	105318	0.000215666
rs1899543			A	-0.0576609	0.00473104	0.0021963	0.0094895	FALSE	105318	0.000187204
rs2007044			A	-0.0886891	-0.00170915	0.00225758	0.00969152	TRUE	105318	0.000281876
rs2053079			A	-0.0707229	0.00273981	0.00255506	0.0110924	TRUE	105318	0.000196428
rs211829			T	0.0590233	0.00197059	0.00226338	0.0098771	TRUE	105318	0.000184108
rs217287			C	0.0690595	-0.00573413	0.00226556	0.00967609	TRUE	105318	0.000219873
rs2332700			C	0.0699924	-0.00267338	0.00254635	0.0109306	FALSE	105318	0.000197277
rs2514218			C	0.0725067	-0.00112296	0.00231029	0.0103465	TRUE	105318	0.000215892
rs2660304			G	-0.108265	-0.00205074	0.00280767	0.0123766	TRUE	105318	0.000269453
rs2851447			G	0.0871864	0.000470501	0.00256373	0.0107653	FALSE	105318	0.000249482
rs2905432			G	0.0685928	8.4387e-05	0.00230928	0.00999076	TRUE	105318	0.000211512
rs2949006			T	0.100117	-0.0120702	0.00277205	0.011887	TRUE	105318	0.000259442
rs2970610			T	0.0678455	0.00211208	0.00234539	0.0100379	TRUE	105318	0.000208227
rs3130820			T	0.247329	0.0145731	0.00337736	0.017694	FALSE	105318	0.000430328
rs34796896			G	0.0832376	-0.00452988	0.00272475	0.0119438	TRUE	105318	0.000214698
rs35346733			G	-0.0869423	0.00355704	0.0027967	0.0124064	TRUE	105318	0.000215892
rs35774874			T	0.0689662	0.00145389	0.00220296	0.0102808	TRUE	105318	0.000206665
rs36043959			G	-0.0803319	0.000897814	0.00272184	0.011584	TRUE	105318	0.00021364
rs3617			C	0.0652258	-0.0023706	0.00221254	0.00958488	TRUE	105318	0.000209648
rs3735025			T	0.0645698	0.0020157	0.00230415	0.00990299	TRUE	105318	0.000200876
rs3743078			C	-0.078167	0.00114952	0.00261562	0.0112105	FALSE	105318	0.000214808
rs4144797			T	0.0817643	0.00428491	0.00231875	0.0100584	TRUE	105318	0.00025041
rs42945			A	-0.0631315	-0.00264847	0.00221341	0.00995258	TRUE	105318	0.000195425
rs4648845			C	-0.0763844	-0.00190985	0.00220973	0.0111298	TRUE	105318	0.000211433
rs4766428			C	-0.0761686	0.00046688	0.00223324	0.0100052	TRUE	105318	0.000234522
rs4936215			A	0.0913022	-0.00150574	0.0026991	0.0121351	TRUE	105318	0.000231779
rs56807175			T	-0.0876003	0.0145639	0.00285545	0.0129552	TRUE	105318	0.000208315
rs5757730			A	-0.0712275	0.0107168	0.00221049	0.0100999	TRUE	105318	0.00021726
rs6002655			C	-0.0750577	0.00623279	0.00224304	0.0098226	TRUE	105318	0.000235397
rs6065094			A	-0.0850896	0.00407528	0.00235065	0.0102117	TRUE	105318	0.000256678
rs61937595			C	0.124957	-0.00529402	0.00384067	0.0188375	TRUE	105318	0.000204362
rs62334820			C	-0.0811124	0.000902382	0.0027399	0.0119066	TRUE	105318	0.000209873
rs6434928			G	0.0729716	0.00928031	0.00233878	0.0100387	TRUE	105318	0.000223935
rs6694545			A	0.0767758	0.000677198	0.00256152	0.0111674	TRUE	105318	0.0002118
rs7010876			T	0.0621294	-0.00429735	0.00252465	0.0107062	FALSE	105318	0.00017879
rs704373			A	0.0645698	-0.00541837	0.00237306	0.0100623	TRUE	105318	0.000197696
rs7129727			G	-0.0625352	0.00675198	0.00234263	0.0103405	TRUE	105318	0.000186321
rs7191183			T	-0.0595271	0.0052573	0.0024107	0.0102486	TRUE	105318	0.000178951
rs7216638			T	0.0645698	-0.00214357	0.00230296	0.0103601	FALSE	105318	0.000192015
rs7432375			G	0.0678455	-0.00547803	0.00224337	0.00978345	TRUE	105318	0.00021364
rs7499750			A	0.0705517	0.00443194	0.00263962	0.0112974	TRUE	105318	0.000192398
rs7508148			T	0.0771462	0.000178646	0.00257706	0.0116855	TRUE	105318	0.00020339
rs7596038			C	0.0671912	-0.00455559	0.0022296	0.009584	TRUE	105318	0.000215982
rs75968099			C	-0.0657446	0.00181451	0.00231888	0.0101518	TRUE	105318	0.000199518
rs7701440			T	-0.0723987	0.00524713	0.00220082	0.00956335	TRUE	105318	0.000233214
rs7789569			T	0.0652258	-0.00291095	0.00230508	0.0100029	TRUE	105318	0.000200889
rs7801375			A	-0.0773455	0.00266295	0.00300479	0.0133139	TRUE	105318	0.000178984
rs7893279			T	0.111273	0.00143689	0.00344842	0.0153887	TRUE	105318	0.000222758
rs7951870			T	-0.0933222	-0.0091373	0.00292404	0.0127929	TRUE	105318	0.000224729
rs9607782			T	-0.0811233	0.00221068	0.00253473	0.0112494	FALSE	105318	0.000222158
										0.0169917

## Sheet: SCZ_drv
etable6. Top SNPs for Driving (P <1e08) on SCZ
Notes: Estimated variance explained by genetic instruments was the sum of estimated variance explained by each variant calculated from reported P values, sample size, and the proportation of cases and controls using the TwoSampleMR R functions get_r_from_lor() and get_r_from_pn().
SNP	Proxy SNP	r2 for proxy	effect_allele.exposure	beta.exposure	beta.outcome	se.outcome	se.exposure	mr_keep	samplesize.exposure	estimate dvariance (%)
rs10083370			G	0.0751075	0.00126098	0.00226192	0.00990787	TRUE	105318	0.000233527
rs10156310			A	0.0727857	0.0049034	0.00261896	0.011735	FALSE	105318	0.000191089
rs10196799			A	0.0560967	-0.00229422	0.00223625	0.00956578	FALSE	105318	0.000180675
rs10650434			A	-0.0853999	0.00137045	0.00224632	0.00967743	TRUE	105318	0.000271825
rs111294930			A	0.082317	-0.00631221	0.00245619	0.0120682	TRUE	105318	0.000210139
rs11409090			A	-0.0598997	0.00236326	0.00230483	0.0100017	TRUE	105318	0.000184514
rs11646127			G	0.070738	-0.00860576	0.00223403	0.00980859	FALSE	105318	0.000222173
rs11685299			C	0.0603422	0.00665267	0.00239397	0.0102447	TRUE	105318	0.000181469
rs11783093			C	0.093126	0.00434656	0.00304014	0.0136047	TRUE	105318	0.000210882
rs1191551			T	0.0728786	0.000818394	0.00265352	0.0116617	TRUE	105318	0.000192536
rs12129573			C	-0.0764492	0.00428901	0.00233674	0.00985997	TRUE	105318	0.000238851
rs12293670			A	0.0807502	0.000176459	0.00238276	0.0101426	TRUE	105318	0.000245254
rs12416331			T	0.145485	0.000110441	0.004189	0.0168904	FALSE	105318	0.000265324
rs12704290			G	0.113953	0.00234502	0.00348657	0.0150418	TRUE	105318	0.000233379
rs12705761			G	0.0655068	-0.00408976	0.00233993	0.00997409	FALSE	105318	0.000202338
rs12898315			G	-0.0568984	0.000685199	0.0022374	0.00954543	TRUE	105318	0.000183647
rs12908161			A	0.0666301	-0.00347215	0.00253298	0.0108889	TRUE	105318	0.000188523
rs12991836			A	-0.0610353	0.00313996	0.00233312	0.00987822	TRUE	105318	0.00019036
rs13107325			C	-0.159606	-0.00156583	0.00424926	0.0192665	TRUE	105318	0.000255186
rs13169274			T	-0.0596439	0.00223891	0.00226169	0.009675	TRUE	105318	0.000189928
rs1319017			G	-0.0664069	0.00371353	0.00235573	0.0102101	TRUE	105318	0.000200377
rs1339227			C	0.0626931	0.00142831	0.00237603	0.010009	TRUE	105318	0.000192975
rs139425113			G	-0.0666004	-0.00220074	0.00284014	0.0115652	TRUE	105318	0.000177423
rs140505938			C	0.0836976	0.00104322	0.00298057	0.0135481	TRUE	105318	0.00019033
rs14403			C	0.0741794	-0.00334206	0.00267866	0.0116171	TRUE	105318	0.000196722
rs1451488			A	-0.0671446	0.00603075	0.0022492	0.00971301	TRUE	105318	0.000212967
rs1473594			T	0.0640071	-0.000216758	0.00227262	0.00965244	TRUE	105318	0.000204293
rs16867576			A	0.101021	0.00199736	0.00324521	0.0150015	TRUE	105318	0.000207461
rs16902086			A	-0.0659689	0.00141127	0.00236714	0.0100633	TRUE	105318	0.000201959
rs17514846			A	-0.0688143	-8.58e-06	0.00224677	0.00982988	TRUE	105318	0.000215666
rs1899543			A	-0.0576609	-0.000161691	0.00222203	0.0094895	FALSE	105318	0.000187204
rs2007044			A	-0.0886891	-0.00131376	0.00228482	0.00969152	TRUE	105318	0.000281876
rs2053079			A	-0.0707229	0.00283272	0.00258396	0.0110924	TRUE	105318	0.000196428
rs211829			T	0.0590233	-0.00648982	0.00228976	0.0098771	TRUE	105318	0.000184108
rs217287			C	0.0690595	-0.00373758	0.00229243	0.00967609	TRUE	105318	0.000219873
rs2332700			C	0.0699924	-0.00740762	0.00257566	0.0109306	FALSE	105318	0.000197277
rs2514218			C	0.0725067	-0.00790874	0.00233696	0.0103465	TRUE	105318	0.000215892
rs2660304			G	-0.108265	0.0153937	0.00284231	0.0123766	TRUE	105318	0.000269453
rs2851447			G	0.0871864	-0.00591362	0.00259397	0.0107653	FALSE	105318	0.000249482
rs2905432			G	0.0685928	0.00066486	0.00233492	0.00999076	TRUE	105318	0.000211512
rs2949006			T	0.100117	-0.00158314	0.00280679	0.011887	TRUE	105318	0.000259442
rs2970610			T	0.0678455	-0.00199286	0.00237418	0.0100379	TRUE	105318	0.000208227
rs3130820			T	0.247329	0.00192705	0.00341707	0.017694	FALSE	105318	0.000430328
rs34796896			G	0.0832376	0.00498519	0.00275662	0.0119438	TRUE	105318	0.000214698
rs35346733			G	-0.0869423	0.00170621	0.00282961	0.0124064	TRUE	105318	0.000215892
rs35774874			T	0.0689662	-0.00129623	0.00222822	0.0102808	TRUE	105318	0.000206665
rs36043959			G	-0.0803319	0.00580874	0.00275358	0.011584	TRUE	105318	0.00021364
rs3617			C	0.0652258	-0.00252396	0.00223888	0.00958488	TRUE	105318	0.000209648
rs3735025			T	0.0645698	0.00154614	0.00233108	0.00990299	TRUE	105318	0.000200876
rs3743078			C	-0.078167	0.00971644	0.00264563	0.0112105	FALSE	105318	0.000214808
rs4144797			T	0.0817643	0.0015307	0.00234738	0.0100584	TRUE	105318	0.00025041
rs42945			A	-0.0631315	-0.000529976	0.00223912	0.00995258	TRUE	105318	0.000195425
rs4648845			C	-0.0763844	-0.00512812	0.00223694	0.0111298	TRUE	105318	0.000211433
rs4766428			C	-0.0761686	0.00264065	0.00225964	0.0100052	TRUE	105318	0.000234522
rs4936215			A	0.0913022	-0.000242708	0.00273037	0.0121351	TRUE	105318	0.000231779
rs56807175			T	-0.0876003	0.00370128	0.00289098	0.0129552	TRUE	105318	0.000208315
rs5757730			A	-0.0712275	-0.00189998	0.00223537	0.0100999	TRUE	105318	0.00021726
rs6002655			C	-0.0750577	-0.00221351	0.002268	0.0098226	TRUE	105318	0.000235397
rs6065094			A	-0.0850896	0.00518883	0.00237765	0.0102117	TRUE	105318	0.000256678
rs61937595			C	0.124957	-0.0105157	0.00388752	0.0188375	TRUE	105318	0.000204362
rs62334820			C	-0.0811124	-0.00101113	0.00277347	0.0119066	TRUE	105318	0.000209873
rs6434928			G	0.0729716	-0.0031609	0.00236827	0.0100387	TRUE	105318	0.000223935
rs6694545			A	0.0767758	0.00040895	0.00259277	0.0111674	TRUE	105318	0.0002118
rs7010876			T	0.0621294	-0.00414626	0.0025543	0.0107062	FALSE	105318	0.00017879
rs704373			A	0.0645698	-0.00258001	0.00240107	0.0100623	TRUE	105318	0.000197696
rs7129727			G	-0.0625352	0.00136876	0.00237029	0.0103405	TRUE	105318	0.000186321
rs7191183			T	-0.0595271	0.00212487	0.00243884	0.0102486	TRUE	105318	0.000178951
rs7216638			T	0.0645698	-0.0060021	0.00232955	0.0103601	FALSE	105318	0.000192015
rs7432375			G	0.0678455	-0.00204499	0.00227011	0.00978345	TRUE	105318	0.00021364
rs7499750			A	0.0705517	-0.00141072	0.00267007	0.0112974	TRUE	105318	0.000192398
rs7508148			T	0.0771462	0.00830249	0.00260633	0.0116855	TRUE	105318	0.00020339
rs7596038			C	0.0671912	-0.000366061	0.00225788	0.009584	TRUE	105318	0.000215982
rs75968099			C	-0.0657446	0.000676604	0.00234643	0.0101518	TRUE	105318	0.000199518
rs7701440			T	-0.0723987	-0.00157231	0.00222712	0.00956335	TRUE	105318	0.000233214
rs7789569			T	0.0652258	0.000248092	0.00233214	0.0100029	TRUE	105318	0.000200889
rs7801375			A	-0.0773455	0.00920655	0.00303971	0.0133139	TRUE	105318	0.000178984
rs7893279			T	0.111273	0.00136945	0.00348911	0.0153887	TRUE	105318	0.000222758
rs7951870			T	-0.0933222	0.000551628	0.00295848	0.0127929	TRUE	105318	0.000224729
rs9607782			T	-0.0811233	0.00142481	0.00256323	0.0112494	FALSE	105318	0.000222158
										0.0169917

## Sheet: MDD_tel
etable7. Top SNPs for Driving (P <1e08) on MDD
Notes: Estimated variance explained by genetic instruments was the sum of estimated variance explained by each variant calculated from reported P values, sample size, and the proportation of cases and controls using the TwoSampleMR R functions get_r_from_lor() and get_r_from_pn().
SNP	Proxy SNP	r2 for proxy	effect_allele.exposure	beta.exposure	beta.outcome	se.outcome	se.exposure	mr_keep	samplesize.exposure	estimate dvariance (%)
rs10149470			A	-0.0266	0.00561096	0.00216714	0.0043	TRUE	500199	8.74633e-05
rs10950398			A	0.0296	0.00357283	0.00218434	0.0044	TRUE	500199	9.5115e-05
rs11135349			A	-0.029	0.00188605	0.00216396	0.0043	TRUE	500199	9.53541e-05
rs12958048			A	0.0307	-0.00456057	0.00229484	0.0046	TRUE	500199	9.43606e-05
rs1432639			A	0.038	-0.00723964	0.00219946	0.0044	TRUE	500199	0.000122103
rs4904738			T	-0.0264	-0.00126923	0.00219466	0.0044	TRUE	500199	8.4833e-05
										0.000579229

## Sheet: MDD_com
etable8. Top SNPs for Computer use (P <1e08) on MDD
Notes: Estimated variance explained by genetic instruments was the sum of estimated variance explained by each variant calculated from reported P values, sample size, and the proportation of cases and controls using the TwoSampleMR R functions get_r_from_lor() and get_r_from_pn().
SNP	Proxy SNP	r2 for proxy	effect_allele.exposure	beta.exposure	beta.outcome	se.outcome	se.exposure	mr_keep	samplesize.exposure	estimate dvariance (%)
rs10149470			A	-0.0266	0.00320907	0.00223085	0.0043	TRUE	500199	8.74633e-05
rs10950398			A	0.0296	8.55e-05	0.00225074	0.0044	TRUE	500199	9.5115e-05
rs11135349			A	-0.029	-0.00801704	0.00223178	0.0043	TRUE	500199	9.53541e-05
rs12958048			A	0.0307	-0.00641117	0.00236182	0.0046	TRUE	500199	9.43606e-05
rs1432639			A	0.038	-0.0103355	0.00226974	0.0044	TRUE	500199	0.000122103
rs4904738			T	-0.0264	0.00421256	0.00225904	0.0044	TRUE	500199	8.4833e-05
										0.000579229

## Sheet: MDD_drv
etable9. Top SNPs for Driving (P <1e08) on MDD
Notes: Estimated variance explained by genetic instruments was the sum of estimated variance explained by each variant calculated from reported P values, sample size, and the proportation of cases and controls using the TwoSampleMR R functions get_r_from_lor() and get_r_from_pn().
SNP	Proxy SNP	r2 for proxy	effect_allele.exposure	beta.exposure	beta.outcome	se.outcome	se.exposure	mr_keep	samplesize.exposure	estimate dvariance (%)
rs10149470			A	-0.0266	-0.00706563	0.00220585	0.0043	TRUE	500199	8.74633e-05
rs10950398			A	0.0296	0.00138103	0.00222446	0.0044	TRUE	500199	9.5115e-05
rs11135349			A	-0.029	0.00182268	0.00220547	0.0043	TRUE	500199	9.53541e-05
rs12958048			A	0.0307	-0.000113863	0.00233564	0.0046	TRUE	500199	9.43606e-05
rs1432639			A	0.038	0.00719958	0.00224223	0.0044	TRUE	500199	0.000122103
rs4904738			T	-0.0264	0.0042633	0.00223341	0.0044	TRUE	500199	8.4833e-05
										0.000579229
