# Supplementary material for: Assessment of Bidirectional Relationships between Leisure Sedentary Behaviors and Neuropsychiatric Disorders: A Two-Sample Mendelian Randomization Study
Source: Genes (Basel). 2022 May 27;13(6):962. doi: 10.3390/genes13060962 (PMC9223103; doi:10.3390/genes13060962)
Supplement: Supplementary file 1 [file genes-13-00962-s001.zip › Supplementary_Tables S1-S15.xlsx]

## Sheet: Content
Supplementary Tables
Supplementary Table S1. Demographic information for summary-level datasets of leisure sedentary behaviours and cognitive function assessment.
Supplementary Table S2. Mendelian randomization extimates for the effects of lesiure sedentary behaviours on AD.
Supplementary Table S3. Table SNPs excluded from the outlier corrected MR-PRESSO analyses and Steiger-filter test between sedentary behaviours and MPD
Supplementary Table S4. Potentiallly plieiotropic SNPs in the Mendelian randomization between Television watching and MPDs
Supplementary Table S5. Heterogeneity (I2, Cochran's Q, Rucker's Q), pleiotropy (MR-Egger intercept) in the examined associations and weak instrument statistics between sedentary behaviours and AD
Supplementary Table S6. Mendelian randomization extimates for the effects of AD on sedentary behaviours
Supplementary Table S7. Heterogeneity (I2, Cochran's Q, Rucker's Q), pleiotropy (MR-Egger intercept) in the examined associations and weak instrument statistics between sedentary behaviours and AD
Supplementary Table S8. Mendelian randomization extimates for the effects of lesiure sedentary behaviours on SCZ
Supplementary Table S9. Heterogeneity (I2, Cochran's Q, Rucker's Q), pleiotropy (MR-Egger intercept) in the examined associations and weak instrument statistics between sedentary behaviours and SCZ
Supplementary Table S10. Mendelian randomization extimates for the effects of SCZ on sedentary behaviours
Supplementary Table S11. Heterogeneity (I2, Cochran's Q, Rucker's Q), pleiotropy (MR-Egger intercept) in the examined associations and weak instrument statistics between SCZ and sedentary behaviours
Supplementary Table S12. Mendelian randomization extimates for the effects of lesiure sedentary behaviours on MDD
Supplementary Table S13. Heterogeneity (I2, Cochran's Q, Rucker's Q), pleiotropy (MR-Egger intercept) in the examined associations and weak instrument statistics between sedentary behaviours and MDD
Supplementary Table S14. Mendelian randomization extimates for the effects of MDD on sedentary behaviours
Supplementary Table S15. Heterogeneity (I2, Cochran's Q, Rucker's Q), pleiotropy (MR-Egger intercept) in the examined associations and weak instrument statistics between MDD and sedentary behaviours

## Sheet: ST1
Supplementary Table S1. Demographic information for summary-level datasets of leisure sedentary behaviours and NPDs
Phenotype	Author and year	Sample size (case/control)	Female (%)	Mean age (year)	Principal covariates	Main consortium	PubMed ID	Reference Genome	Population
Leisure sedentary behaviours	Yordi J. van de Vegte et al. (2020)	422218	0.543	57.4 (SD 8.0)	Age-squared, age, sex, age-sex interaction, the first 30 principal components (PCA’s)	UK Biobank	32317632	hg19	European
Alzheimer's disease	Kunkle et al. (2019)	21,982 cases/41,944 controls	0.585	72.6	Sex, age	IGAP	30820047	hg20	European
Schizophrenia	Pardiñas et al. (2018)	40675 cases/64643controls	/	/	20 principal components	PGC	29483656	hg22	European
Major depression disorder	Wray NR et al. (2018)	170,756 cases/329,443 controls	/	/	/	PGC	29700475	hg21	European

## Sheet: ST2
Supplementary Table S2. Mendelian randomization extimates for the effects of lesiure sedentary behaviours on AD
a Television watching - AD
Method	N snps	b	95%LCI_b	95%UCI_b	se	OR	95%LCI	95%UCI	P value
Inverse variance weighted (fixed effects)	85	0.146191	-0.0866883	0.37907	0.118816	1.15742	0.916963	1.46093	0.218548
Inverse variance weighted (random effects)	85	0.146191	-0.0998474	0.392229	0.12553	1.15742	0.904976	1.48028	0.244184
Weighted median	85	4.565e-05	-0.347794	0.347794	0.177446	1.00066	0.706244	1.41594	0.999839
Weighted mode	85	-0.0973599	-1.08915	0.894431	0.506016	0.907229	0.336502	2.44594	0.847889
MR-Egger	85	-0.155553	-0.982727	0.671621	0.422027	0.855942	0.374289	1.95741	0.371
Inverse variance weighted (excluding pleiotropic SNPs)	78	0.0920478	-0.167817	0.351913	0.132584	1.09642	0.845508	1.42178	0.48752
MR-PRESSO	85	0.187818	-0.0396488	0.415285	0.116055	1.20661	0.180056	2.32231	0.108704
MR-PRESSO outlier correct	-	-	-	-	-	-	-	-	-
b Computer use - AD
Method	N snps	b	95%LCI_b	95%UCI_b	se	OR	95%LCI	95%UCI	P value
Inverse variance weighted (fixed effects)	22	-0.646527	-1.12596	-0.167097	0.244607	0.523862	0.324342	0.846118	0.00821453
Inverse variance weighted (random effects)	22	-0.646527	-1.20976	-0.0832977	0.287361	0.523862	0.29827	0.920077	0.0244572
Weighted median	22	-1.13284	-1.81823	-0.447459	0.349686	0.322116	0.162313	0.63925	0.000896102
Weighted mode	22	-1.23258	-2.26411	-0.201052	0.52629	0.29154	0.103923	0.81787	0.0213599
MR-Egger	22	-2.38224	-4.21032	-0.55416	0.932693	0.0923436	0.0148417	0.574554	0.007
Inverse variance weighted (excluding pleiotropic SNPs)	20	-0.621876	-1.18937	-0.0543868	0.289535	0.536936	0.304414	0.947066	0.0317263
MR-PRESSO	24	-0.668705	-1.21792	-0.119487	0.280213	0.512371	0.295844	0.887375	0.0256288
MR-PRESSO outlier correct	-	-	-	-	-	-	-	-	-
c Driving - AD
Method	N snps	b	95%LCI_b	95%UCI_b	se	OR	95%LCI	95%UCI	P value
Inverse variance weighted (fixed effects)	4	-0.435964	-1.52575	0.653818	0.556011	0.646641	0.217459	1.92287	0.432986
Inverse variance weighted (random effects)	4	-0.435964	-1.71449	0.842562	0.652309	0.646641	0.180056	2.32231	0.503917
Weighted median	4	-0.322764	-1.65169	1.01155	0.678022	0.724145	0.191726	2.73508	0.634048
Weighted mode	4	-0.097476	-2.2305	2.03555	1.08828	0.907124	0.107474	7.65648	0.934275
MR-Egger	4	-0.524381	-3.73183	2.68307	1.63645	0.591922	0.023949	14.6299	0.296186
Inverse variance weighted (excluding pleiotropic SNPs)	3	-0.562167	-2.34925	1.22492	0.911779	0.569973	0.0954404	3.40389	0.537525
MR-PRESSO	4	-0.435964	-1.71449	0.842562	0.652309	0.646641	0.180056	2.32231	0.551742
MR-PRESSO outlier correct	-	-	-	-	-	-	-	-	-
Abbreviations: AD = Alzheimer's disease; 95%CI = 95% confidence interval; 95%LCI = 95% lower confidence interval; 95%HCI = 95% higher confidence interval; MR-PRESSO = Mendelian randomization pleiotropy residual sum and outlier; b = beta; OR = odds ratio; SNPs = single-nucleotide polymorphisms.

## Sheet: ST3
Supplementary Table S3. Table SNPs excluded from the outlier corrected MR-PRESSO analyses and Steiger-filter test between sedentary behaviours and NPDs
Television watching
OutlierSNP	Outcome	Status	Methods
rs10189857	SCZ	Outlier/Horizontal pleiotropy	MR_PRESSO (Outlier test/Global test)
rs114600294	SCZ	Outlier/Horizontal pleiotropy	MR_PRESSO (Outlier test/Global test)
rs11714337	SCZ	Outlier/Horizontal pleiotropy	MR_PRESSO (Outlier test/Global test)
rs11810109	SCZ	Outlier/Horizontal pleiotropy	MR_PRESSO (Outlier test/Global test)
rs13107325	SCZ	Outlier/Horizontal pleiotropy	MR_PRESSO (Outlier test/Global test)
rs17379561	SCZ	Outlier/Horizontal pleiotropy	MR_PRESSO (Outlier test/Global test)
rs3135044	SCZ	Outlier/Horizontal pleiotropy	MR_PRESSO (Outlier test/Global test)
rs4845364	SCZ	Outlier/Horizontal pleiotropy	MR_PRESSO (Outlier test/Global test)
rs4973576	SCZ	Outlier/Horizontal pleiotropy	MR_PRESSO (Outlier test/Global test)
rs57585211	SCZ	Outlier/Horizontal pleiotropy	MR_PRESSO (Outlier test/Global test)
rs72834698	SCZ	Outlier/Horizontal pleiotropy	MR_PRESSO (Outlier test/Global test)
rs9569734	SCZ	Outlier/Horizontal pleiotropy	MR_PRESSO (Outlier test/Global test)
rs9834970	SCZ	Outlier/Horizontal pleiotropy	MR_PRESSO (Outlier test/Global test)
rs1031423	MDD	Outlier/Horizontal pleiotropy	MR_PRESSO (Outlier test/Global test)
rs10739499	MDD	Outlier/Horizontal pleiotropy	MR_PRESSO (Outlier test/Global test)
rs62471080	MDD	Outlier/Horizontal pleiotropy	MR_PRESSO (Outlier test/Global test)
rs9563168	MDD	Outlier/Horizontal pleiotropy	MR_PRESSO (Outlier test/Global test)
rs9834970	MDD	Outlier/Horizontal pleiotropy	MR_PRESSO (Outlier test/Global test)
Computer use
OutlierSNP	Outcome	Status	Methods
rs13262595	SCZ	Outlier/Horizontal pleiotropy	MR_PRESSO (Outlier test/Global test)
rs2734849	SCZ	Outlier/Horizontal pleiotropy	MR_PRESSO (Outlier test/Global test)
rs4073003	SCZ	Outlier/Horizontal pleiotropy	MR_PRESSO (Outlier test/Global test)
rs9372625	SCZ	Outlier/Horizontal pleiotropy	MR_PRESSO (Outlier test/Global test)
rs113851275	MDD	Outlier/Horizontal pleiotropy	MR_PRESSO (Outlier test/Global test)
rs11749912	MDD	Outlier/Horizontal pleiotropy	MR_PRESSO (Outlier test/Global test)
rs166835	MDD	Outlier/Horizontal pleiotropy	MR_PRESSO (Outlier test/Global test)
rs17789218	MDD	Outlier/Horizontal pleiotropy	MR_PRESSO (Outlier test/Global test)
rs2068625	MDD	Outlier/Horizontal pleiotropy	MR_PRESSO (Outlier test/Global test)
rs2734849	MDD	Outlier/Horizontal pleiotropy	MR_PRESSO (Outlier test/Global test)
rs73578186	MDD	Outlier/Horizontal pleiotropy	MR_PRESSO (Outlier test/Global test)
Driving
OutlierSNP	Outcome	Status	Methods
rs10186876	SCZ	Outlier/Horizontal pleiotropy	MR_PRESSO (Outlier test/Global test)
rs1198575	SCZ	Outlier/Horizontal pleiotropy	MR_PRESSO (Outlier test/Global test)
rs4765541	SCZ	r square of exposure is lower than r square of outcome	TwoSampleMR package (Steiger filter test)
rs1198575	MDD	Outlier/Horizontal pleiotropy	MR_PRESSO (Outlier test/Global test)
rs4765541	MDD	Outlier/Horizontal pleiotropy	MR_PRESSO (Outlier test/Global test)
rs6012558	MDD	Outlier/Horizontal pleiotropy/r square of exposure is lower than r square of outcome	MR_PRESSO (Outlier test/Global test)/TwoSampleMR package (Steiger filter test)
Notes: Excluded variants are shown for the analyses between television watching, computer use, driving and NPDs (AD, SCZ, and MDD) for P < 1E-08. MR-PRESSO does not return exact P-values in case variants are filtered and therefore non-exact P-value are shown. OutlierSNP = Single nucletide polymorphism removed from the analysis by MR-PRESSO or TwoSampleMR. Status = The reason why this SNP were rem…

## Sheet: ST4
Supplementary Table S4. Potentiallly plieiotropic SNPs in the Mendelian randomization between sedenatry behaviours and NPDs
Television watching
Pleitropy SNPs	Pos(hg19)	Reported traits (PhenoScanner v2)	dbSNP gene	GWAS catalog traits linked to this gene
rs11245482	chr10:126733546	Weight;Frequency of other exercises in last 4 weeks;Overall health rating	CTBP2	Apolipoprotein A1 levels
rs12554512	chr9:23352293	Years of educational attainment;Qualifications: college or university degree	intergenic	Feeling lonely;Schizophrenia vs bipolar disorder (ordinary least squares (OLS)); Age at first sexual intercourse
rs2971640	chr2:107624618	Qualifications: college or university degree	PPP1R2P5	NA
rs3754970	chr2:162091836	Qualifications: college or university degree;Fluid intelligence score	TANK	Intelligence;Brain morphology (MOSTest)
rs4382592	chr9:134870755	Years of educational attainment;BMI	MED27	Self-reported math ability;Highest math class taken (MTAG)
rs6905544	chr6:98411631	Qualifications: college or university degree;Years of educational attainment	MIR2113	C-reactive protein levels
rs9563168	chr13:54247827	Bipolar disorder	intergenic	Educational attainment (years of education)
rs9964724	chr18:35159124	Qualifications: college or university degree;Educational attainment years of education	MIR4318,CELF4	Educational attainment (years of education)
Computer use
Pleitropy SNPs	Pos(hg19)	Reported traits (PhenoScanner v2)	dbSNP gene	GWAS catalog traits linked to this gene
rs11749912	chr5:88065628	Qualifications: college or university degree;Years of educational attainment	MEF2C-AS2,MEF2C	NA
rs13262595	chr8:143316970	Schizophrenia;Qualifications: A levels or as levels or equivalent	TSNARE1	Intelligence;Mental health study participation (completed survey);Acceptance of an invitation to participate in a mental health questionnaire
rs4073003	chr17:19148305	Schizophrenia;Qualifications: college or university degree	EPN2	NA
Driving
Pleitropy SNPs	Pos(hg19)	Reported traits (PhenoScanner v2)	dbSNP gene	GWAS catalog traits linked to this gene
rs6012558	chr20:47531286	Waist circumference adjusted for BMI adjusted for smoking behaviour	PREX1,ARFGEF2	Waist circumference adjusted for BMI (joint analysis main effects and smoking interaction);Intelligence
Notes: Genetic variants in LD > 0.8 with previously established variants were removed from the fixed or random effects meta-analysis in case they were associated with all traits. SNP denotes single nucletide polymorphism.

## Sheet: ST5
Supplementary Table S5. Heterogeneity (I2, Cochran's Q, Rucker's Q), pleiotropy (MR-Egger intercept) in the examined associations and weak instrument statistics between sedentary behaviours and AD
Exposure	I2			Cochran's Q			Rucker's Q			Q-Q'			MR-Egger intercept			Weak instrument statistics
	index	95%CI min	95%CI max	Q	df	P-value	Q	df	P-value	Q-Q'	df	P-value	Intercept	se	P-value	F-value
Television	0.1	0.01	0.32	93.7612	84	0.218657	93.1067	83	0.210137	0.654503	1	0.418507	-0.00836441	0.0109504	0.447127	38.606
Computer	0.28	0	0.57	28.9827	21	0.114417	28.9138	20	0.0894714	0.0689465	1	0.792877	0.00419772	0.0192218	0.413565	40.2009
Driving	0.27	0	0.73	4.12915	3	0.247852	1.86102	2	0.394353	2.26813	1	0.132059	-0.105759	0.0677396	0.940768	37.477
Notes: An I2 > 25% and Cochran's Q an one-side P-value of < 0.05 were considered as an indication of heterogeneity and, as a consequence, of pleiotropy in the from the inverse variance weighted fixed effect model. A significant difference (one-side P <0.05) between the Cochran's Q and Rucker's Q (Q-Q') was considered to indicate the MR-Egger test to be a better method to study the genetic associa…

## Sheet: ST6
Supplementary Table S6. Mendelian randomization extimates for the effects of AD on sedentary behaviours
a AD - Television watching
Method	N snps	b	95%LCI_b	95%UCI_b	se	OR	95%LCI	95%UCI	P value(1e-08)
Inverse variance weighted (fixed effects)	3	0.00219682	-0.0322402	0.0366338	0.0175699	1.0022	0.968274	1.03731	0.901
Inverse variance weighted (random effects)	3	0.00219682	-0.0611419	0.0655355	0.0323157	1.0022	0.94069	1.06773	0.946
Weighted median	3	-0.0278789	-0.0750716	0.0193139	0.0240779	0.972506	0.927677	1.0195	0.247
Weighted mode	3	-0.0324031	-0.0946885	0.0298822	0.0317782	0.968116	0.909656	1.03033	0.415
MR-Egger	3	0.0595057	-0.0329914	0.152003	0.0471924	1.06131	0.968	1.16416	0.078
MR-PRESSO	3	-0.000360282	-0.0425972	0.0418766	0.0215495	0.99964	0.958297	1.04277	0.988
MR-PRESSO (outlier correct)	-	-	-	-	-	-	-	-	-
b AD- Computer use
Method	N snps	b	95%LCI_b	95%UCI_b	se	OR	95%LCI	95%UCI	P value(1e-08)
Inverse variance weighted (fixed effects)	3	0.00608661	-0.0289671	0.0411403	0.0178845	1.00611	0.971448	1.042	0.734
Inverse variance weighted (random effects)	3	0.00608661	-0.0634445	0.0756177	0.035475	1.00611	0.938526	1.07855	0.864
Weighted median	3	0.00282942	-0.0532487	0.0589075	0.0286113	1.00283	0.948144	1.06068	0.921
Weighted mode	3	-0.00696843	-0.0957245	0.0817876	0.0452837	0.993056	0.908714	1.08523	0.892
MR-Egger	3	0.0839379	-0.00169581	0.169572	0.0436907	1.08756	0.998	1.1848	0.059
MR-PRESSO	3	-0.00725334	-0.0580089	0.0435022	0.0258957	0.992773	0.943642	1.04446	0.798
MR-PRESSO (outlier correct)	-	-	-	-	-	-	-	-	-
c AD - Driving
Method	N snps	b	95%LCI_b	95%UCI_b	se	OR	95%LCI	95%UCI	P value(1e-08)
Inverse variance weighted (fixed effects)	3	-0.0211592	-0.0566153	0.014297	0.0180899	0.979063	0.944958	1.0144	0.242
Inverse variance weighted (random effects)	3	-0.0211592	-0.0371605	-0.00515781	0.00816396	0.979063	0.963522	0.994856	0.00955
Weighted median	3	-0.0143065	-0.0560935	0.0274805	0.0213199	0.985795	0.945451	1.02786	0.502
Weighted mode	3	-0.0137388	-0.0593564	0.0318788	0.0232743	0.986355	0.942371	1.03239	0.615
MR-Egger	3	-0.0267175	-0.105653	0.0522179	0.0402732	0.973636	0.899737	1.05361	0.242
MR-PRESSO	3	-0.00844356	-0.0311983	0.0143111	0.0116095	0.991592	0.969283	1.01441	0.52
MR-PRESSO outlier correct	-	-	-	-	-	-	-	-	-
Abbreviations: AD = Alzheimer's disease; 95%CI = 95% confidence interval; 95%LCI = 95% lower confidence interval; 95%HCI = 95% higher confidence interval; MR-PRESSO = Mendelian randomization pleiotropy residual sum and outlier; b = beta; OR = odds ratio; SNPs = single-nucleotide polymorphisms.

## Sheet: ST7
Supplementary Table S7. Heterogeneity (I2, Cochran's Q, Rucker's Q), pleiotropy (MR-Egger intercept) in the examined associations and weak instrument statistics between AD and sedentary behaviours
Exposure	I2			Cochran's Q			Rucker's Q			Q-Q'			MR-Egger intercept			Weak instrument statistics
	index	95%CI min	95%CI max	Q	df	P-value	Q	df	P-value	Q-Q'	df	P-value	Intercept	se	P-value	F-value
Television	0.7	0	0.91	6.76577	2	0.0339494	4.81882	1	0.0281507	1.94696	1	0.162915	0.00541819	0.00388308	0.162915	14.26
Computer	0.75	0.15	0.92	7.86901	2	0.0195554	2.64113	1	0.104129	5.22788	1	0.0222276	0.00903652	0.00642294	0.0797264	14.26
Driving	0	0	0.9	0.407343	2	0.81573	0.275742	1	0.599506	0.131601	1	0.716778	-0.00145027	0.00209928	0.755167	14.26
Notes: An I2 > 25% and Cochran's Q an one-side P-value of < 0.05 were considered as an indication of heterogeneity and, as a consequence, of pleiotropy in the from the inverse variance weighted fixed effect model. A significant difference (one-side P <0.05) between the Cochran's Q and Rucker's Q (Q-Q') was considered to indicate the MR-Egger test to be a better method to study the genetic associa…

## Sheet: ST8
Supplementary Table S8. Mendelian randomization extimates for the effects of lesiure sedentary behaviours on SCZ
a Television watching - SCZ
Method	N snps	b	95%LCI_b	95%UCI_b	se	OR	95%LCI	95%UCI	P value
Inverse variance weighted (fixed effects)	98	-0.0506789	-0.181751	0.0803935	0.0668737	0.950584	0.833809	1.08371	0.448553
Inverse variance weighted (random effects)	98	-0.0506789	-0.367087	0.265729	0.161433	0.950584	0.692749	1.30438	0.753573
Weighted median	98	-0.122926	-0.353385	0.107534	0.117581	0.884329	0.702307	1.11353	0.295814
Weighted mode	98	-0.16963	-0.72567	0.386409	0.283694	0.843977	0.484	1.47169	0.551277
MR-Egger	98	-0.440459	-1.93433	1.05341	0.762179	0.643741	0.144521	2.86742	0.564689
Inverse variance weighted (excluding pleiotropic SNPs)	91	-0.0476071	-0.381929	0.286715	0.170573	0.953508	0.682543	1.33204	0.780167
MR-PRESSO	98	-0.134665	-0.430853	0.161523	0.151116	0.874009	0.649955	1.1753	0.374718
MR-PRESSO (outlier correct)	85	-0.118424	-0.306723	0.108636	0.105959	0.905704	0.735855	1.11476	0.271379
b Computer use - SCZ
Method	N snps	b	95%LCI_b	95%UCI_b	se	OR	95%LCI	95%UCI	P value
Inverse variance weighted (fixed effects)	23	-0.483476	-0.764543	-0.202409	0.143402	0.616636	0.465547	0.816761	0.000747644
Inverse variance weighted (random effects)	23	-0.483476	-1.21274	0.245792	0.372076	0.616636	0.29738	1.27863	0.193806
Weighted median	23	-0.0171225	-0.507761	0.473516	0.250326	0.983023	0.601842	1.60563	0.945467
Weighted mode	23	0.158292	-0.77678	1.09336	0.477078	1.17151	0.459884	2.9843	0.743184
MR-Egger	23	0.233058	-3.10227	3.56838	1.7017	1.26245	0.0449472	35.4592	0.89237
Inverse variance weighted (excluding pleiotropic SNPs)	21	-0.62195	-1.31102	0.0671169	0.351565	0.536896	0.269546	1.06942	0.0768787
MR-PRESSO	23	-0.415516	-1.10765	0.276616	0.353129	0.659999	0.330335	1.31866	0.250866
MR-PRESSO (outlier correct)	19	-0.334822	-0.776489	0.106845	0.22534	0.715465	0.460018	1.11276	0.152912
c Driving - SCZ
Method	N snps	b	95%LCI_b	95%UCI_b	se	OR	95%LCI	95%UCI	P value
Inverse variance weighted (fixed effects)	4	-2.31221	-2.98678	-1.63764	0.344168	0.099042	0.0504496	0.194438	1.83905e-11
Inverse variance weighted (random effects)	4	-2.31221	-4.43701	-0.187407	1.08408	0.099042	0.0118312	0.829106	0.0329353
Weighted median	4	-1.6782	-2.97849	-0.377925	0.663408	0.186709	0.0508698	0.685282	0.0114169
Weighted mode	4	-1.1074	-3.13074	0.915948	1.03232	0.330418	0.0436854	2.49914	0.362009
MR-Egger	4	-11.9734	-28.7754	4.82854	8.57242	6.30979e-06	3.18437e-13	125.028	0.297303
Inverse variance weighted (excluding pleiotropic SNPs)	3	-2.57793	-3.5603	2.3164	1.49916	0.536896	0.0284303	10.1391	0.0855081
MR-PRESSO	4	-2.31221	-4.43702	-0.187407	1.08408	0.099042	0.0118312	0.829106	0.122677
MR-PRESSO outlier correct	2	-2.40616	-4.22351	-0.588808	0.927219	0.0901611	0.0146472	0.554988	0.234159
Abbreviations: SCZ = schizophrenia; 95%CI = 95% confidence interval; 95%LCI = 95% lower confidence interval; 95%HCI = 95% higher confidence interval; MR-PRESSO = Mendelian randomization pleiotropy residual sum and outlier; b = beta; OR = odds ratio; SNPs = single-nucleotide polymorphisms.

## Sheet: ST9
Supplementary Table S9. Heterogeneity (I2, Cochran's Q, Rucker's Q), pleiotropy (MR-Egger intercept) in the examined associations and weak instrument statistics between sedentary behaviours and SCZ
Exposure	I2 (95% CI)			Cochran's Q			Rucker's Q			Q-Q'			MR-Egger intercept			Weak instrument statistics
	index	95%CI min	95%CI max	Q	df	P-value	Q	df	P-value	Q-Q'	df	P-value	Intercept	se	P-value	F-value
Television	0.83	0.8	0.86	565.255	97	3.28436e-67	563.647	96	2.63467e-67	1.60823	1	0.20474	0.00654584	0.0125072	0.300359	42.3068
Computer	0.85	0.79	0.9	148.108	22	1.0878e-20	146.803	21	7.09822e-21	1.30418	1	0.25345	-0.0112563	0.0260607	0.667103	39.6412
Driving	0.9	0.77	0.96	29.765	3	1.54641e-06	18.1	2	0.000117392	11.665	1	0.000636866	0.147647	0.130049	0.373978	32.8427
Notes: An I2 > 25% and Cochran's Q an one-side P-value of < 0.05 were considered as an indication of heterogeneity and, as a consequence, of pleiotropy in the from the inverse variance weighted fixed effect model. A significant difference (one-side P <0.05) between the Cochran's Q and Rucker's Q (Q-Q') was considered to indicate the MR-Egger test to be a better method to study the genetic associa…

[truncated: 6 more sheets: ST10, ST11, ST12, ST13, ST14, ST15]
